## Masculinity and the mechanisms of human self-domestication—Ben Gleeson

### 1 **Masculinity and the mechanisms of human self-domestication**

2 Ben Thomas Gleeson<sup>1</sup>

3 <sup>1</sup>Fenner School of Environment and Society, Linnaeus Way, Australian National University, Acton,  
4 ACT, 2601. Email: [ben.gleeson@anu.edu.au](mailto:ben.gleeson@anu.edu.au)

5 This manuscript represents a redrafting of an earlier paper posted at BioRxiv following two rounds of  
6 review at *Evolution and Human Behaviour*. This redrafting **will require further changes and review**  
7 before being resubmitted elsewhere.

8 The current draft MS contains significant changes from the earlier draft. Valuable feedback provided  
9 by previous reviewers suggested the original article was likely to be of interest to readers and,  
10 therefore, worthy of eventual publication, but was too wide-ranging, contained sections of excessive  
11 speculation, and required further clarification of hypotheses and testable predictions. I acknowledge  
12 these concerns and have continued to develop this line of research.

13 In response to reviewers' comments:

- 14 1. The previous MS will now be treated via three separate texts. These will:
  - 15 i. Explore links between masculinity and the human self-domestication process,  
16 including mechanisms of selection on masculine behaviour and morphology (the  
17 present draft MS).
  - 18 ii. Explore possible influences of the self-domestication process upon human beards, i.e.  
19 the operation of neural crest cells in the formation of the facial dermis of human  
20 males.
  - 21 iii. Outline links between female preferences for neural crest cell-derived signals of  
22 masculinity and vertebrate immunity due to their contributions to the thymus and  
23 other immune system components.
- 24 2. The present MS, therefore, has had several sections of the earlier draft removed, including the  
25 section on beards, which prompted a change of title.
- 26 3. A key mechanistic hypothesis of the present MS is that changes to human masculinity, as  
27 related to human self-domestication, are likely to involve interaction between testosterone and  
28 neural crest cell-derived tissues [a combination of hypotheses provided by Cieri et al. (2014)  
29 and Wilkins et al. (2014)]. Existing observational and experimental research is used here to  
30 demonstrate the influence of testosterone on growth and development in several key features  
31 of domestication syndrome.
- 32 4. The counterintuitive observation that males of domesticated non-human species display  
33 relatively diminished 'masculinity' *but also show relatively elevated testosterone levels*,  
34 prompts the suggestion that lower androgen receptor density within neural crest cells may  
35 drive domesticated reductions in masculinity.
- 36 5. These hypothesised interactions between testosterone and neural crest cell-derived tissues  
37 require further elaboration and will be a primary avenue for productive future investigation.
- 38 6. The next draft of this MS will include a more detailed presentation of previous findings on  
39 relevant human evolutionary changes, including: reduced sexual dimorphism; skeletal  
40 gracility; brain and tooth size reductions, and altered cranial morphology (brow ridges, jaw  
41 size, and the evolution of the human chin).

42

## Masculinity and the mechanisms of human self-domestication—Ben Gleeson

1  
2  
3  
4  
5  
6  
7  
8  
9  
10  
11  
12  
13  
14  
15  
16  
17  
18  
19  
20  
21  
22  
23  
24  
25  
26  
27  
28  
29  
30

### Contents

|                                                                         |    |
|-------------------------------------------------------------------------|----|
| Abstract.....                                                           | 2  |
| Keywords.....                                                           | 3  |
| 1. Introduction.....                                                    | 3  |
| 2. NCCs and the domestication process.....                              | 4  |
| 3. Self-domestication.....                                              | 7  |
| 4. NCCs and male secondary sexual traits.....                           | 8  |
| 5. Testosterone and NCC-derived masculine features.....                 | 11 |
| 6. Human self-domestication via selection against masculinity.....      | 14 |
| 7. Limitations, key questions, and directions for further research..... | 17 |
| 8. Conclusion.....                                                      | 20 |
| Acknowledgements.....                                                   | 21 |
| References.....                                                         | 21 |

### Abstract

Recent fossil analysis points to ‘feminisation’ of human cranio-facial morphology as evidence of human self-domestication leading to the emergence of behavioural modernity. Research regarding the biophysical nature of the domestication process more generally, suggests that traits associated with domestication syndrome emerge via hypoplasia of neural crest cell (NCC) derived features. The present article offers an integration of these insights by showing that multiple traits indicative of human masculinity are commonly either directly derived from embryonic NCCs, or are significantly influenced by structures with NCC origins. Based on this observation, a logical expectation is that differential selection on indicators of relative masculinity may moderate processes of human self-domestication. I present a model of human self-domestication based on reductions in mean masculinity and review selective pathways that might achieve this reduction using existing research on selection for or against human masculinity. I suggest female mate choice trade-offs between masculine traits and elevated paternal investment may be a primary driver of human self-domestication, but also show how self-domestication might relate to other theories of recent

## Masculinity and the mechanisms of human self-domestication—Ben Gleeson

1 human evolution—especially regarding increased human sociability and cooperative  
2 capacity. Finally, I discuss potential limitations to the hypothesis and suggest avenues for  
3 further empirical investigation of links between masculine traits and the physiology of human  
4 self-domestication.

### 5 **Keywords**

6 Masculinity; Neural Crest Cells; Human Self-domestication; Testosterone; Sexual Selection.

### 7 **1. Introduction**

8 Recent research concerning domestication syndrome and related human evolutionary change  
9 suggests influential roles played by both neural crest cells (NCCs) (Wilkins, Wrangham, &  
10 Tecumseh Fitch, 2014) and prenatal exposure to testosterone (Cieri, Churchill, Franciscus,  
11 Tan, & Hare, 2014). Based on an integration of these insights, and following further review  
12 of related evidence, I hypothesise that testosterone provides an elevated regulatory influence  
13 on the proliferation of NCC-derived masculine tissues in various taxa, possibly via enhanced  
14 densities of androgen receptors within this cell lineage. Multiple male secondary sexual  
15 characteristics, previously identified as signals of physiological masculinity, consist of, or are  
16 strongly influenced by, structures derived from embryonic neural crest cells (NCCs) (Section  
17 4). It follows, therefore, that since domestication—a physiological process, involving a  
18 recognised syndrome of traits—consists of correlated hypoplasia of features composed from  
19 NCCs (Wilkins et al., 2014), selection for or against NCC-derived masculine traits should  
20 moderate the expression of domestication syndrome within a given lineage. If so, this effect  
21 offers substantial physiological insight into previously-described processes of human self-  
22 domestication (Brüne, 2007; Cieri et al., 2014; Fischer, 1914; Franciscus, Maddux, &  
23 Schmidt, 2013; Groves, 1999; Hare, 2017; Leach, 2003; Lorenz, 1940; Wrangham, 2014,  
24 2018).

25 Given this link to masculinity, female preferences in favour of moderately masculine males  
26 due to enhanced pair bonding and paternal investment potential (Kruger, 2006) provide one  
27 potential impetus for human self-domestication (Cieri et al., 2014). However, generalisable  
28 advantages of increased cooperation may also have promoted this process by dampening  
29 male aggression and competition thereby helping to limit intra-group conflict in favour of  
30 collaborative intergroup hostilities (Alexander, 1990; Flinn, Geary, & Ward, 2005;  
31 Wrangham & Glowacki, 2012). In addition, socially-oriented coalitions may have selected

## Masculinity and the mechanisms of human self-domestication—Ben Gleeson

1 against excessively-aggressive masculine individuals using group ostracism and capital  
2 punishment (Boehm, 2012, 2014; Pinker, 2011; Wrangham, 2014, 2018).

3 In effect, the present article proposes and describes a biophysical mechanism consistent with  
4 several existing theories of recent human evolution, especially regarding the widely noted  
5 emergence of human hyper-sociability and cooperative capacity (Burkart et al., 2014;  
6 Burkart, Hrdy, & Van Schaik, 2009; Hawkes, 2013; Hrdy, 2011; Sterelny, 2011). I begin  
7 with a presentation of existing research that links vertebrate NCCs and the domestication  
8 process. Following this, I provide evidence for a common association between NCCs and the  
9 secondary sexual traits of male vertebrates; including those previously associated with human  
10 masculinity. I then explore published observations concerning the interaction of testosterone  
11 and NCC-derived tissues and structures and consider this influence as a mechanism in both  
12 domestication and varied expressions of masculinity across multiple taxa. Next, I outline  
13 some of the implications of these mechanisms with reference to sexual selection and self-  
14 domestication in human evolution. Finally, I conclude by highlighting some apparent  
15 limitations of the proposed mechanism and provide suggestions for further research and  
16 empirical investigation of this topic.

### 17 **2. NCCs and the domestication process**

18 NCCs are a transient and pluripotent lineage of cells involved in the formation of the  
19 vertebrate neural tube. Following the neural tube's formation, these cells disperse along  
20 predetermined pathways throughout the developing embryo, providing cellular progenitors  
21 for various neural, endocrine, pigment, cardiac, skeletal and dental cells (Gilbert, 2010; B. K.  
22 Hall, 2008; J. E. Hall, 2010; Schoenwolf, Bleyl, Brauer, & Francis-West, 2008). They  
23 contribute to the production and patterning of a wide variety of structures and tissues,  
24 including: the bones, connective tissues, muscles, and dermis of the craniofacial region; the  
25 bones of the middle-ear; the teeth; the hyoid and the larynx; the pigmented melanocytes of  
26 vertebrate skin, hair, and feathers; various glands including the thymus, the anterior pituitary,  
27 the adrenal medulla and associated autonomic nerve structures; as well as parts of the  
28 vertebrate heart (Gilbert, 2010; B. K. Hall, 2008; J. E. Hall, 2010; Matsuoka et al., 2005;  
29 McGonnell, McKay, & Graham, 2001; Schoenwolf et al., 2008; Ueharu et al., 2017). Due to  
30 these diverse contributions, NCCs exert a considerable influence on the morphology,  
31 physiology and behaviour of all vertebrate taxa, prompting the suggestion they be considered  
32 a 'fourth germ layer' in embryonic development (B. K. Hall, 2000).

## Masculinity and the mechanisms of human self-domestication—Ben Gleeson

1 [Figure 1 here] (in development)

2 **Figure 1.** Embryonic neural crest cell migration pathways and destinations.

3 Domestication syndrome consists of a diverse suite of traits which domesticated animal  
4 populations tend to share in common when compared to their wild relatives or ancestors  
5 (Hemmer, 1990; Leach, 2003, 2007; Sánchez-Villagra, Geiger, & Schneider, 2016; L. N.  
6 Trut, 1999; Wilkins et al., 2014; Zeder, 2015). The underlying cause of correlated variation in  
7 these traits has long been a subject of scientific interest and speculation (Darwin, 1859, 1868;  
8 Hemmer, 1990; Jensen, 2006; Zeder, 2015). Recognised symptoms of domestication  
9 syndrome include: reduced prognathism; diminished craniofacial cartilage and bone; smaller  
10 teeth; smaller crania; diminished size and function of sensory organs; changes in  
11 pigmentation; dampened fight or flight responses (i.e. less reactive aggression); elevated  
12 docility and sociability towards humans; lessened sexual dimorphism; paedomorphism  
13 (generally shifted ontogenic timing); and changed reproductive behaviour and fertility  
14 regimes (Hemmer, 1990; Leach, 2003; Sánchez-Villagra et al., 2016; L. N. Trut, 1999;  
15 Wilkins et al., 2014; Zeder, 2008, 2015). Based on the observation that most of these traits  
16 involve features either directly derived from NCCs, or likely to be affected by NCC-  
17 influenced processes, Wilkins et al. (2014) recently proposed that the domestication  
18 syndrome emerges in response to heritable alteration in the functioning of embryonic NCCs,  
19 and consequent hypoplasia of NCC-derived features—effectively a ‘mild neurocristopathy’.

20 Long-running experiments using captive silver foxes (*Vulpes vulpes*) have demonstrated that  
21 breeding selection in favour of increased sociability (or against aggressive reactivity, or ‘fight  
22 or flight’ type responses) induces a range of traits typical of domestication with a given  
23 population (Belyaev, 1979; L. Trut et al., 2006; L. Trut, Oskina, & Kharlamova, 2001; L. N.  
24 Trut, Oskina, & Kharlamova, 2009). This selection is thought to operate by inducing a  
25 heritable tendency to a smaller and less responsive adrenal system (Wilkins et al., 2014; but  
26 see Kruska, 1988, p. 221 regards reduction in brain limbic structures), a trait long recognized  
27 among domesticated populations (Hemmer, 1990). Hypoplasia of the adrenal medulla, along  
28 with other components of the autonomic nervous system—also formed from NCC  
29 progenitors—is likely to dampen natural levels of behavioural reactivity driven by the  
30 Hypothalamic-Pituitary-Adrenal (HPA) axis (Gilbert, 2010; J. E. Hall, 2010; Wilkins et al.,  
31 2014). As such, selection for sociability appears to operate via heritable changes in  
32 embryonic NCC behaviour and, according to Wilkins et al. (2014), since NCCs provide



## Masculinity and the mechanisms of human self-domestication—Ben Gleeson

- 1 progenitors for multiple other features, this change promotes the broader collection of altered
- 2 characteristics, as associated with domestication syndrome (Figure 2).

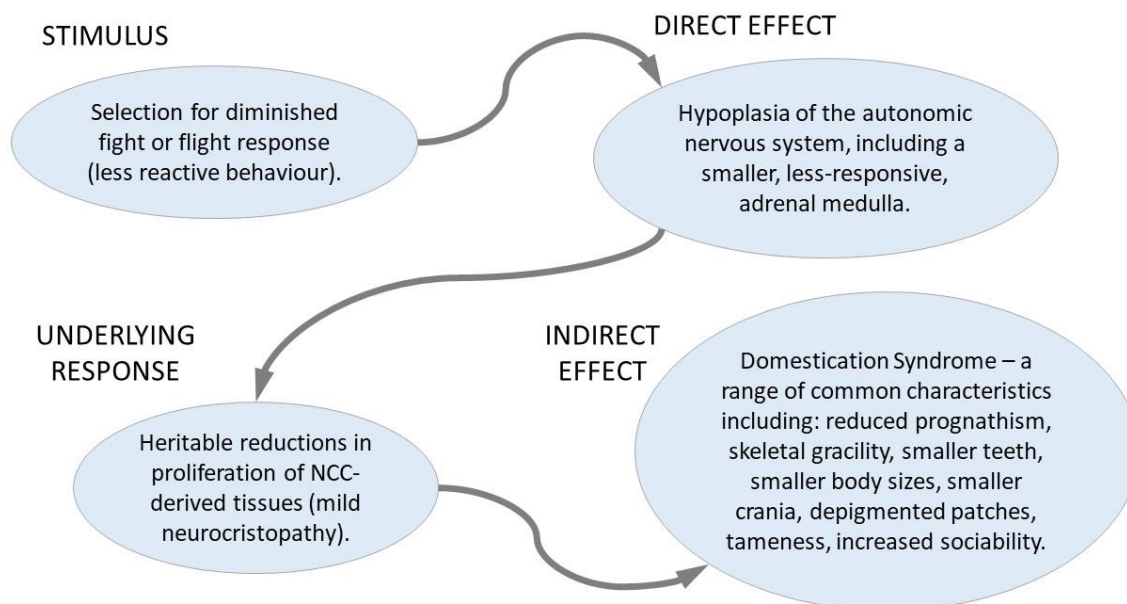

3  
4 **Figure 2.** Proposed chain of influence in mammalian domestication from Stimulus (selection for less  
5 reactive behaviour) to Indirect Effect (Domestication Syndrome) (based on L. Trut et al., 2006, 2001;  
6 and Wilkins et al., 2014).

7 Wilkins et al. (2014) argue that this shift in NCC functioning occurs in domesticated animals  
8 via either: reduced initial quantities, reduced migration, or reduced in-situ proliferation of  
9 NCCs, or their cellular derivatives. They propose dampened migration as the most likely  
10 primary mechanism, and expect this effect to result from pleiotropic and epistatic genetic  
11 interactions, which could explain noted trait variability between domesticated populations  
12 and species (Hemmer, 1990; Sánchez-Villagra et al., 2016; Wilkins et al., 2014). Contra to  
13 this emphasis on *dispersal*, however, documented effects of testosterone on the growth of  
14 multiple NCC-derived tissues (discussed further at Section 4) may suggest changes in  
15 testosterone-mediated NCC proliferation and growth as a more likely underlying cause.

16 With regard to pre-historic selection on sociable behaviour, Charles Darwin (1859, 1868)  
17 originally suggested that a period of ‘unconscious selection’ of domesticated animals would  
18 have preceded any deliberate selection in favour of desirable traits. Following from this, it  
19 seems obvious, for reasons of self-preservation, that human domesticators would naturally,  
20 and unconsciously, have selected against particularly dangerous or aggressive animals that  
21 would have been exceptionally difficult to handle. Since these behaviours are more often

## Masculinity and the mechanisms of human self-domestication—Ben Gleeson

1 associated with males of many species, we should expect initial selection for less reactively  
2 aggressive responses would disproportionately affect the inheritance of associated male traits  
3 (Helmer, Goucherin, Monchot, Peters, & Sana Segui, 2002; Kruska, 1988; Zeder, 2012).  
4 Given demonstrated correlations seen under selection for non-aggressive behaviour (Belyaev,  
5 1979; L. N. Trut, 1999; L. N. Trut et al., 2016), this male biased selection may have been  
6 enough to induce domestication syndrome across many species of domesticated animals and  
7 would explain why reduced sexual dimorphism is a common feature of domestication. This  
8 suggestion—that domestication syndrome initially emerges primarily due to unconscious  
9 selection against male aggression—is supported by observations of relatively little selection  
10 on females, as evidenced by investigation of mtDNA across multiple domesticated taxa  
11 (Marshall, Dobney, Denham, & Capriles, 2014).

### 12 **3. Self-domestication**

13 Accepting that selection for sociable behaviour originally stimulated the recognised array of  
14 correlated traits seen in traditional domesticates, it appears plausible to expect, as some have  
15 suggested (Hare, Wobber, & Wrangham, 2012), that mammalian populations in general will  
16 undergo a process of physiological domestication wherever socioecological conditions  
17 promote selection for lower reactive aggression and relative sociability. For example,  
18 numerous previous authors have documented the contrasting sociosexual behaviour and  
19 elevated female social status of bonobos (*Pan paniscus*) when compared to their close  
20 relative, the chimpanzee (*P. troglodytes*) (Furuichi, 2011; Tokuyama & Furuichi, 2016;  
21 White, 1996; White, Waller, & Boose, 2013; White & Wood, 2007). These social conditions  
22 are believed to have limited the reproductive benefits of male-male competition, effectively  
23 selecting for lower male aggression and allowing for increased sociability in this species  
24 (Furuichi, 2011; Hare et al., 2012; Surbeck, Deschner, Schubert, Weltring, & Hohmann,  
25 2012; Wobber, Hare, Lipson, Wrangham, & Ellison, 2013). In response to this selection, and  
26 in line with experimentally demonstrated changes in captive foxes (L. N. Trut et al., 2006,  
27 2009), wild bonobos appear to have ‘self-domesticated’ since, when compared to  
28 chimpanzees, they show multiple morphological, behavioural and physiological  
29 characteristics associated with domestication syndrome (Hare et al., 2012).

30 Based on observations of similar characteristics in our own species, multiple previous authors  
31 have proposed that ancestral humans also underwent a process of self-domestication (Brüne,  
32 2007; Cieri et al., 2014; Fischer, 1914; Franciscus et al., 2013; Groves, 1999; Hare, 2017;

## Masculinity and the mechanisms of human self-domestication—Ben Gleeson

1 Leach, 2003; Lorenz, 1940; Wrangham, 2014, 2018). In relation to earlier *Homo sapiens*,  
2 evidence for this suggestion includes: smaller body sizes and increased skeletal gracility  
3 (Frayser, 1980; Frayer & Wolpoff, 1985; Kappelman, 1996; Ruff, Trinkaus, & Holliday, 1997;  
4 Ruff, 2002; Ryan & Shaw, 2015); less-masculine facial morphology and reduced  
5 prognathism (Groves, 1989; Cieri et al., 2014; Carrier & Morgan, 2015); less sexual  
6 dimorphism (Brace & Ryan, 1980; Frayer, 1980; Frayer & Wolpoff, 1985); relative  
7 paedomorphism (Gould, 1966, 1977; Alberch, Gould, Oster, & Wake, 1979; Shea, 1989);  
8 smaller cranial capacity (Henneberg, 1988; Henneberg & Steyn, 1993; Kappelman, 1996; Liu  
9 et al., 2014); tooth size reduction (Brace & Ryan, 1980; Brace, Rosenberg, & Hunt, 1987;  
10 Calcagno & Gibson, 1988); and increased sociability (Pinker, 2011; Sterelny, 2011, 2012;  
11 Cieri et al., 2014; Hare, 2017).

12 Whilst some authors have assumed comparable evolutionary shifts seen in both human and  
13 non-human domesticates resulted from shared adaptation to the same modified domestic  
14 environment and altered foods (e.g. Brüne, 2007; Leach, 2003), others have proposed  
15 behavioural selection in favour of sociability (similar to that applied in the fox experiments)  
16 provides a more likely common cause (Cieri et al., 2014; Hare, 2017; Wrangham, 2014,  
17 2018). In support of this suggestion, recent expansion in human cultural complexity and  
18 technological innovation has been widely proposed to result from enhanced in-group  
19 sociability, and an elevated capacity for cooperative interaction (Boehm, 2014; Burkart et al.,  
20 2009; Cieri et al., 2014; Flinn et al., 2005; Hare, 2017). Although proposed evolutionary  
21 explanations for these changes vary between authors, any increase in sociability would  
22 logically imply some form of selection in favour of that sociability. Based on long-standing  
23 observational and experimental evidence (Belyaev, 1979; Hemmer, 1990; L. Trut et al., 2006,  
24 2001; L. N. Trut, 1999; L. N. Trut et al., 2009; Wilkins et al., 2014), it seems reasonable to  
25 expect such selection to stimulate aspects of domestication syndrome as a natural biophysical  
26 response.

### 27 **4. NCCs and male secondary sexual traits**

28 The role of NCCs in the emergence of domestication syndrome is of singular significance to  
29 research regarding selection on human masculinity since many previously identified  
30 masculine traits involve structures that are either produced, or strongly influenced, by  
31 embryonic NCCs and their various cellular derivatives (Table 1). As a principle example,  
32 NCCs provide embryonic progenitors for all of the vertebrate craniofacial region, including:



## Masculinity and the mechanisms of human self-domestication—Ben Gleeson

1 the frontal bone and associated brow ridges, the mandible and maxilla, the nasal bone and  
 2 cartilage, and the zygomatic arches, as well as influencing the patterning of overlying facial  
 3 muscles (Cordero et al., 2011; Gilbert, 2010; Knight & Schilling, 2013). As such, cranial  
 4 NCCs provide the cellular foundations for all structural indicators of facial masculinity as  
 5 widely discussed in relation to human sexual selection (e.g. Carré, McCormick, & Mondloch,  
 6 2009; Carrier & Morgan, 2015; Feinberg, DeBruine, Jones, & Little, 2008; Lefevre, Lewis,  
 7 Perrett, & Penke, 2013; Mitteroecker, Windhager, Müller, & Schaefer, 2015). NCCs also  
 8 form the dermis of the face and neck, along with associated hair follicles thereby contributing  
 9 progenitor tissues for human facial hair, especially the male beard (Jinno et al., 2010; Krause  
 10 et al., 2014; Schoenwolf et al., 2008) which is also a particularly masculine trait and thought  
 11 to be a focus of sexual selection (Dixson & Brooks, 2013; Dixson, Rantala, Melo, & Brooks,  
 12 2017).

13 **Table 1:** Several important masculine traits and their relation to NCCs.

| <b>Masculine trait</b>                                    | <b>Previously discussed by...</b>                                                                    | <b>Influence of NCCs</b>                                                                                                                                                                                                                                                             |
|-----------------------------------------------------------|------------------------------------------------------------------------------------------------------|--------------------------------------------------------------------------------------------------------------------------------------------------------------------------------------------------------------------------------------------------------------------------------------|
| <b>Facial dimensions, including width to height ratio</b> | Mitteroecker et al. (2015); Carré et al. (2009); Lefevre et al. (2013), Hodges-Simeon et al. (2016). | NCCs form all of the facial skeleton, including the frontal bone, mandible, maxilla, zygomatics, and nasal structures, as well as associated cartilage and connective tissue (Bhatt, Diaz, & Trainor, 2013; Cordero et al., 2011; Santagati & Rijli, 2003; Schoenwolf et al., 2008). |
| <b>Large brow ridges</b>                                  | Dixson (2016); Cieri et al. (2014).                                                                  | NCCs provide cellular progenitors of the frontal bone including the supra-orbital region of the skull (Mishina & Snider, 2014; Santagati & Rijli, 2003; Schoenwolf et al., 2008).                                                                                                    |
| <b>Thick facial hair</b>                                  | Dixson and Brooks (2013); Dixson et al. (2017); Dixson et al. (2017).                                | NCCs produce the dermis of the face and neck, including associated hair follicles (Jinno et al., 2010; Krause et al., 2014; Schoenwolf et al., 2008).                                                                                                                                |
| <b>Lower vocal pitch</b>                                  | Feinberg et al. (2008); Puts et al. (2016); Puts et al. (2006).                                      | NCCs provide progenitor cells of the hyoid, larynx, and styloid process (Bhatt et al., 2013; Mishina & Snider, 2014; Wilkins et al., 2014).                                                                                                                                          |
| <b>Shoulder width, and shoulder to hip ratio</b>          | Lee et al. (2015)<br>Windhager et al. (2011).                                                        | NCCs provide progenitors for parts of the shoulder girdle and their connective tissues, and pattern the development of associated muscles                                                                                                                                            |

## Masculinity and the mechanisms of human self-domestication—Ben Gleeson

---

|                                     |                                                                                                                                                                                                                                                                                                         |
|-------------------------------------|---------------------------------------------------------------------------------------------------------------------------------------------------------------------------------------------------------------------------------------------------------------------------------------------------------|
|                                     | (Matsuoka et al., 2005; McGonnell et al., 2001; Noden, 1986; Valasek et al., 2010).                                                                                                                                                                                                                     |
| <b>Elevated testosterone levels</b> | Alvergne et al. (2009); Burnham et al. (2003). NCCs contribute to the adrenal and pituitary glands (Ueharu et al., 2017) influencing the Hypothalamic-Pituitary-Adrenal and Hypothalamic-Pituitary-Gonadal axes, both of which contribute to testosterone production (Gilbert, 2010; J. E. Hall, 2010). |

---

1

2 Further, NCCs form the larynx and hyoid (Gilbert, 2010; Schoenwolf et al., 2008), as well as  
3 the styloid process (Bhatt et al., 2013)—an attachment site for muscles that control the tongue  
4 and larynx. These contributions suggest altered NCC proliferation, as associated with  
5 domestication syndrome, would substantially influence vocal qualities, including voice pitch,  
6 another recognized indicator of relative masculinity (Feinberg et al., 2008; Puts et al., 2016;  
7 Puts, Jones, & DeBruine, 2012). NCCs also contribute to the development of the vertebrate  
8 shoulder region, influencing its relative size and robusticity by forming sections of the  
9 clavicle and scapula bones whilst providing connective sites and tissues, and directing  
10 developmental patterning of major neck and shoulder muscles (Ericsson, Knight, &  
11 Johanson, 2013; Matsuoka et al., 2005; McGonnell et al., 2001; Noden, 1986; Valasek et al.,  
12 2010). Assuming no associated change in the (non-NCC-derived) pelvis, these contributions  
13 suggest varied NCC proliferation should influence both shoulder width and the shoulder-to-  
14 hip-ratio, which have also been proposed as indicators of relative masculinity (Lee et al.,  
15 2015; Windhager et al., 2011).

16 Many non-human taxa also show conspicuous NCC-derived masculine structures associated  
17 with sexually dimorphic physiology and display. In non-human primates, masculinity  
18 regularly occurs as sexually dimorphic craniofacial features. Relevant structures include:  
19 brow ridges, teeth (especially canines), cheek flanges, and sagittal crests, each of which are  
20 derived from embryonic NCC progenitors. Interestingly, male cheek flanges and exaggerated  
21 sagittal crests emerge at sexual maturity, or even later in adulthood (Balolia, Soligo, &  
22 Lockwood, 2013; Balolia, Soligo, & Wood, 2017). This delayed developmental timing  
23 demonstrates both stem-cell-like extended potency of the NCC-derived cells involved, as  
24 well as interactions with androgen hormones and related social signalling. For instance, male  
25 orangutans (*Pongo* spp.) can subsist for years as adult sub-dominants without cheek flanges,  
26 but flanges develop upon achieving relative social dominance (Dunkel et al., 2013;

## Masculinity and the mechanisms of human self-domestication—Ben Gleeson

1 Thompson, Zhou, & Knott, 2012). As a further example, antlers, which grow annually on  
2 males of the Cervidae in response to seasonal testosterone fluctuation, are another NCC-  
3 derived masculine feature (Davis, Brakora, & Lee, 2011).

4 Aside from these pronounced structural traits, varied colouration of hair, skin, and feathers in  
5 many vertebrate often relies on melanocytes which are also derived from NCCs (B. K. Hall,  
6 2008; J. E. Hall, 2010). These colours are commonly sexually differentiated, are  
7 predominantly darker or more colourful in males of a given taxa, and regularly act as  
8 ornaments in intersexual selection (Darwin, 1871; Dubuc, Allen, Maestriperi, & Higham,  
9 2014; Evans, Goldsmith, & Norris, 2000; Heck, 1951; Vandenberg, 1965). As with  
10 masculine structures, male colourations are often absent in youth, but emerge at sexual  
11 maturity in response to elevated testosterone circulation. In male mandrills (*Mandrillus*  
12 *sphinx*) adult NCC-derived colouration of the face, rump, and genitalia also fluctuates in  
13 association with the testosterone shifts accompanying changed social status (Setchell &  
14 Dixon, 2001). Note, that the structurally-derived blue colouration in mandrills requires an  
15 underlying melanocyte layer in the rump which is not present within the NCC-derived blue  
16 facial dermis (Prum & Torres, 2004).

17 NCCs may also be associated with masculine behaviour in many species. As mentioned,  
18 these cells compose multiple components of the peripheral nervous system, including  
19 sympathetic and parasympathetic ganglia, and the adrenal medulla (Gilbert, 2010; J. E. Hall,  
20 2010; Schoenwolf et al., 2008; Wilkins et al., 2014). As such, relative proliferation of  
21 embryonic NCCs should directly moderate the propensity for autonomic reactivity effected  
22 by the Hypothalamic-Pituitary-Adrenal (HPA) axis (Wilkins et al., 2014), especially the so-  
23 called ‘fight or flight’ response. Additionally, NCCs contribute to the development of the  
24 anterior pituitary and its various hormone-secreting cells (Ueharu et al., 2017) suggesting  
25 they may influence levels of HPA axis reactivity via contributions to both the adrenal *and* the  
26 pituitary glands. Further, NCC contributions to the pituitary suggest potential to moderate  
27 other male endocrine functions, including the regulation of testosterone, as well as growth  
28 and thyroid hormones.

### 29 **5. Testosterone and NCC-derived masculine features**

30 Whilst Wilkins et al. (2014) compellingly highlight associations between NCCs and the  
31 majority of traits seen in mammalian domestication syndrome, Cieri et al. (2014) focussed  
32 specifically on the potential influence of self-domestication in humans and used ancestral

## Masculinity and the mechanisms of human self-domestication—Ben Gleeson

1 decline in the masculinity of the (NCC-derived) craniofacial region to infer prehistoric  
2 reductions in prenatal testosterone exposure. Their observations imply either reduced  
3 maternal circulating testosterone, or relatively lessened androgen receptor densities, across  
4 the populations studied (Cieri et al., 2014). Here, I employ a logical integration of these  
5 studies to suggest that the proliferation of NCCs, or their derived cells and tissues, is often  
6 particularly responsive to testosterone.

7 This hypothesis is supported by evidence from multiple previous studies involving NCC-  
8 derived masculine traits and features. For example, recent research has confirmed a link  
9 between levels of prenatal testosterone exposure and hypermasculinised human faces  
10 (Whitehouse et al., 2015) as was inferred by Cieri et al. (2014) in relation to human self-  
11 domestication. Circulating testosterone has also been shown to correlate with facial  
12 masculinity among both adolescents (Marečková et al., 2011), and in adult men (Hodges-  
13 Simeon et al., 2016; Lefevre et al., 2013; Penton-Voak & Chen, 2004). Aside from these  
14 comparative studies, experimental work by Verdonck et al. (1999) showed testosterone  
15 treatment in boys with unusually delayed puberty led to increased upper and total facial  
16 height. In addition, administration of anabolic steroids in young rats has been shown to cause  
17 increased length of the craniofacial skeleton, especially the midface, maxilla, and mandible  
18 (Barrett & Harris, 1993). Conversely, neonatal and prepubertal castration in rats causes  
19 diminished craniofacial growth, especially with regard to anterior length (Verdonck et al.,  
20 1998).

21 As described in Section 3, numerous masculine signals in wild non-human taxa—including  
22 sagittal crests, cheek flanges, antlers, and various colourations—are NCC-derived and  
23 conspicuously responsive to fluctuations in circulating testosterone. In humans, the effects of  
24 elevated pubertal testosterone are also well established; involving various NCC-derived  
25 masculine traits, including: growth and development of the larynx leading to altered vocal  
26 pitch; the growth of thick facial hair from the dermis of the face and neck; and increased  
27 structural masculinity of the facial region; among other testosterone-mediated changes  
28 (Gilbert, 2010; Widmaier, Raff, Strang, & Vander, 2010).

29 Interestingly, recently described NCC contributions to the anterior pituitary (Ueharu et al.,  
30 2017) suggest a circular relationship between testosterone production and NCC proliferation  
31 since it implicates NCCs in the function of the Hypothalamic-Pituitary-Gonadal (HPG) axis,  
32 the principal regulatory system for male testosterone production (Gilbert, 2010; J. E. Hall,

## Masculinity and the mechanisms of human self-domestication—Ben Gleeson

1 2010). Wilkins et al. (2014) also hypothesised a connection between altered NCC behaviour,  
2 domestication syndrome, and the HPG axis in their discussion of the shifted timing of  
3 reproductive physiology among domesticated female foxes. However, these authors do not  
4 consider the potential effect of suppressed NCC activity upon the HPG axis of *male* foxes,  
5 nor upon the subsequent production of testosterone.

6 Aside from small quantities produced by the (NCC-derived) adrenal medulla, most male  
7 testosterone is produced within the Leydig cells of the testes, a process triggered by the  
8 release of luteinizing hormone from the anterior pituitary (Gilbert, 2010; J. E. Hall, 2010).  
9 Therefore, the fact that this important gland receives significant input from NCC lineages  
10 appears to suggest a functional link between decreased proliferation of NCCs, lower  
11 production of pituitary luteinizing hormone as part of the HPG axis, and generally lower  
12 levels of testosterone production in less-masculine males. If this description were accurate,  
13 we would expect both less-masculinised individuals and domesticated populations in general,  
14 to show lower circulating testosterone levels than their more-masculine, or non-domesticated,  
15 ancestors and relatives.

16 However, whilst this relationship appears to have been demonstrated with regard to variation  
17 in masculinity among modern humans (Lefevre et al., 2013; Penton-Voak & Chen, 2004),  
18 available research does not support the same relationship in domesticated versus non-  
19 domesticated animal comparators. Researchers comparing adolescent guinea pigs with wild  
20 cavies (the nearest non-domesticated relative) (Künzl & Sachser, 1999; Zipser, Schlekung,  
21 Kaiser, & Sachser, 2014), and wild mouflon sheep with 10 domesticated breeds and  
22 crossbreeds (Lincoln, Lincoln, & McNeilly, 1990), actually found higher testosterone  
23 concentrations in the domesticated forms.

24 These counterintuitive contrary results may be a logical (though unexplained) aspect of  
25 changes to the feedback systems of endocrine regulation under domestication syndrome, or  
26 may result from directional human selection in favour of elevated reproductive performance  
27 in domesticated male animals (e.g. see Katz, 2007). Either way, it suggests that hypoplasia of  
28 NCC-derived masculine features does not result simply from reduced testosterone levels, and  
29 supports Cieri et al.'s (2014) alternative inference (in relation to humans) that androgen  
30 receptor densities are the point of difference between domesticated and non-domesticated  
31 comparators. Following from this proposal, the specific mechanistic hypothesis presented in



## Masculinity and the mechanisms of human self-domestication—Ben Gleeson

1 the current paper is that domesticated hypoplasia of masculine features relies on a lower  
2 density of androgen receptors, particularly within NCC-derived cells and tissues.

### 3 **6. Human self-domestication via selection against masculinity**

4 Accepting there has been an evolutionary trend toward human self-domestication and given  
5 the proposal that this occurred primarily as selection for sociability which led to mean  
6 reductions in NCC-derived masculinity, it remains to consider what evolutionary pressures  
7 are likely to have promoted this socialisation process. Recent research explicitly describing  
8 human self-domestication has identified three primary mechanisms; these are: (1) general  
9 social benefits, whereby improved sociability would provide enhanced survival and  
10 Darwinian fitness via cooperative exchange (Cieri et al., 2014; Hare, 2017); (2) group  
11 ostracism, where groups naturally ostracise, or exact capital punishment upon, excessively  
12 aggressive and dominant individuals (Wrangham, 2014, 2018); and (3) female mating  
13 preferences, whereby women would preferentially select for more sociable and less-  
14 masculine male reproductive partners who are more inclined to paternal investment strategies  
15 (Cieri et al., 2014).

16 With regard to the latter proposal, previous research examining women's preferences for  
17 men's masculine traits has suggested these vary depending on menstrual cycling and whether  
18 long or short-term relationships are sought (DeBruine, Jones, Frederick, et al., 2010;  
19 Gangestad & Thornhill, 2008; Little, Saxton, et al., 2010; Little, Jones, & Burriss, 2007;  
20 Penton-Voak et al., 1999; but see Harris, 2013; and Wood, Kressel, Joshi, & Louie, 2014).  
21 Further, such preferences appear to be enhanced under conditions of high pathogen presence  
22 (DeBruine, Jones, Crawford, Welling, & Little, 2010; Little, DeBruine, & Jones, 2010) and  
23 elevated social inequality (Brooks et al., 2010). These observations conform to expectations  
24 that women are adaptively predisposed to making context-dependent mating choices between  
25 males with either 'good genes' (and elevated masculinity), or those with a higher propensity  
26 for pair-bonding and paternal investment (Kruger, 2006; Little, Connely, Feinberg, Jones, &  
27 Roberts, 2011; Quist et al., 2012; Trivers, 1972).

28 Boothroyd et al. (2017) recently showed a significant non-linear correlation between facial  
29 masculinity and offspring survival in two traditional human groups. In this study, moderately  
30 masculine fathers had lower offspring mortality than those with both relatively low and  
31 relatively high masculinity (Boothroyd et al., 2017). Combined with existing sexual selection  
32 theory (Kruger, 2006; Trivers, 1972), this result appears to indicate the relatively limited

## Masculinity and the mechanisms of human self-domestication—Ben Gleeson

1 survival of offspring from either theoretical extreme on the continuum between ‘low  
2 masculinity, but higher inclination to paternal investment’, and ‘high masculinity, but low  
3 paternal investment’. It suggests a centralised optimum of masculinity regards offspring  
4 survival, and a degree of stabilizing selection with implications for the adaptiveness of female  
5 preferences toward either extreme (Boothroyd et al., 2017).

6 Though not explicitly addressing human self-domestication, the work of several other authors  
7 supports potentially related evolutionary mechanisms more reminiscent of the ‘social  
8 benefits’ (Cieri et al., 2014) and ‘ostracism’ (Wrangham, 2014, 2018) hypotheses. For  
9 example, multiple influential contributions address the evolutionary benefits of enhanced  
10 human sociability and collaborative capacity (Sterelny, 2011, 2012), especially via  
11 cooperative reproductive efforts (Burkart et al., 2014; Hawkes, 2013; Hrdy, 2011).  
12 Additionally, the nature of human intersexual selection provides a flourishing field with  
13 numerous contributors (Archer, 2009; Brooks et al., 2010; DeBruine, Jones, Crawford, et al.,  
14 2010; Feinberg et al., 2008; Kruger, 2006; Lee et al., 2015; Thornhill, Chapman, &  
15 Gangestad, 2013). The proposal that group ostracism and punishment could act as selection  
16 for domesticated sociability (Wrangham, 2014, 2018) mirrors work by Boehm (2012, 2014)  
17 and Pinker (2011), among others. And, finally, the suggestion that cooperative male  
18 sociability followed selection for reduced in-group rivalry to support collaborative  
19 competition and inter-group hostility (Alexander, 1990; Flinn et al., 2005; Wrangham &  
20 Glowacki, 2012) provides another potentially domesticating influence.

21 From the Middle Pleistocene, human evolution has involved reduction, or significant change,  
22 in several biophysical indicators of masculinity, including skeletal robusticity, upper-body  
23 strength, and body size sexual dimorphism (Carrier & Morgan, 2015; Frayer & Wolpoff,  
24 1985; Hill, Bailey, & Puts, 2017; Lindenfors & Tullberg, 2011; Ruff, 2002; Ryan & Shaw,  
25 2015), as well as craniofacial robusticity and prognathism (Carrier & Morgan, 2015; Cieri et  
26 al., 2014). These physical changes coincide with an expansion of cultural and technological  
27 complexity, widely thought to indicate increased social tolerance and cooperative capacity  
28 (Boehm, 2014; Burkart et al., 2014; Cieri et al., 2014; Flinn et al., 2005; Hare, 2017; Hawkes,  
29 2013; Hrdy, 2011; Sterelny, 2011). Whilst several hypotheses have been proposed to explain  
30 these evolutionary changes (Boehm, 2014; Burkart et al., 2014; Carrier & Morgan, 2015;  
31 Flinn et al., 2005; Frayer, 1980; Frayer & Wolpoff, 1985; Hill et al., 2017; Hrdy, 2011;  
32 Pinker, 2011), each is limited by the absence of specific biophysical mechanisms aside from

## Masculinity and the mechanisms of human self-domestication—Ben Gleeson

1 disparate selection for unspecified genes which might promote each trait in relative isolation.  
2 Contrastingly, the correlated behavioural, physiological, and morphological changes  
3 associated with domestication syndrome have been experimentally demonstrated, and  
4 repeatedly confirmed across different species over a significant period (Belyaev, 1979; L.  
5 Trut et al., 2006; L. N. Trut, 1999; L. N. Trut et al., 2009). As such, the self-domestication  
6 process may offer a mechanistic foundation for multiple lines of research on selective  
7 processes and change in recent human evolution.

8 One aspect of human evolution that must have significantly benefited lower levels of  
9 masculinity, is the increasing altriciality of human infants (van Schaik, 2016; Zollikofer &  
10 Ponce de León, 2010). This trend would inevitably increase the relative fitness of capable  
11 parental investors, certainly among cooperative female kin, and, to some extent, among males  
12 as well (Hrdy, 2011). Reduced sexual dimorphism is a recurrent trait among cooperatively  
13 breeding species (Clutton-Brock et al., 2006; Rubenstein & Lovette, 2009) suggesting this  
14 trend in humans might reflect increasing paternal investment. Coincident increase in human  
15 social and communication complexity might also have enhanced the fitness of more sociable  
16 paternal investors via group sanctions against particularly masculine reproductive behaviours,  
17 including: extra-pair copulation, violent sexual coercion, and unwanted mate guarding.  
18 Varying levels of female social status would also moderate the efficacy of the latter two  
19 mating strategies, limiting their relative fitness wherever women exercised relative sexual  
20 autonomy.

21 However, any intersexual selection operating in favour of more sociable, less-masculine,  
22 males must have occurred in tandem with intra-sexual selection (forms of male-male  
23 competition) often likely to exert a contrasting influence. Despite our noted trajectory of de-  
24 masculinisation, humans remain a sexually dimorphic species in several characteristics, and  
25 multiple traits indicate past and continuing male competition (Carrier & Morgan, 2015; Fink,  
26 Weege, Manning, & Trivers, 2014; Hill et al., 2017; Scott, Clark, Boothroyd, & Penton-  
27 Voak, 2013; Sell, Hone, E, & Pound, 2012). Hill et al. (2017) have argued that apparent  
28 reduction in human sexual dimorphism is consistent with changes in intrasexual selection  
29 leading to enhanced same-sex intimidation, or ‘formidability’, instead of actual combat.  
30 Certainly, moderation of in-group male-male competition would be a necessary precondition,  
31 if, as has been suggested, increased human sociability required more collaborative forms of

## Masculinity and the mechanisms of human self-domestication—Ben Gleeson

1 competition (Flinn et al., 2005; Hill et al., 2017), especially as violent intergroup hostility  
2 (Wrangham & Glowacki, 2012).

3 Considering all of the above, Table 3 provides a summary of mechanisms that might  
4 influence processes of human self-domestication based on selection for decreased masculinity  
5 and increased social and cooperative capacities. These are presented in the form of positive  
6 and negative feedback which emphasises the interactions between multiple selective  
7 pressures that must have varied across our evolutionary history.

8 **Table 2:** Selective feedbacks affecting human sociability, masculinity, and self-domestication.

| <b>Types of feedback</b> | <b>Relevant influences</b>                                                                                                                                                                                                               |
|--------------------------|------------------------------------------------------------------------------------------------------------------------------------------------------------------------------------------------------------------------------------------|
| <b>Positive</b>          | Increasing altriciality<br>Female preference for paternal investment<br>High population density and increased reliance on a sociocultural niche<br>Ostracism of aggressive individuals<br>Group collaboration in inter-group hostilities |
| <b>Negative</b>          | Direct male-male competition<br>Female selection in favour of masculine ‘good genes’                                                                                                                                                     |

### 9 **7. Limitations, key questions, and directions for further research**

10 A potential limitation to any empirical study of human self-domestication is the identification  
11 of suitable comparators. Whilst this issue has been solved in the case of previous animal  
12 breeding experiments, it almost goes without saying that such experiments are ethically,  
13 morally, and practically impossible among humans. It follows that any study of human self-  
14 domestication must rely on observational and comparative research of existing populations  
15 alone. This should not be problematic since comparative research is easily as robust as  
16 experimental work so long as suitable statistical controls are applied for potentially  
17 confounding influences (Thornhill & Fincher, 2013). In association with existing  
18 experimental research on domesticated animals, comparative research on past and present  
19 humans should adequately support further empirical study.

20 It must be noted, however, that comparisons may be problematic for other reasons. Since  
21 unique evolutionary selection and drift tend to operate on various traits in any given  
22 population, increasing phylogenetic distance means potential comparators should show many  
23 changes unrelated to the mechanisms of domestication syndrome. For this reason, only  
24 closely-related comparator lineages are likely to prove useful. In humans, comparisons  
25 between distantly ancestral and modern populations indicate long-term directional change

## Masculinity and the mechanisms of human self-domestication—Ben Gleeson

1 suggestive of domestication syndrome (Cieri et al., 2014). These results demonstrate that all  
2 modern humans are relatively self-domesticated in comparison with earlier people. However,  
3 simple comparison of features known to vary between distantly-related modern populations  
4 will involve numerous confounding influences due to interceding cultural norms and  
5 environmental factors. Further, as with most comparisons of distant human groups, variation  
6 *within* populations is likely to exceed that observed via interpopulation comparisons, this is  
7 certainly true of relative masculinity, and is also likely regarding self-domestication. As such,  
8 temporal, socioeconomic, and cultural comparisons of closely related human lineages offer  
9 the most productive and rigorous comparisons for future investigation of this topic.

10 Possibly the most outstanding inconsistency raised by the hypothesis proposed in this article  
11 relates to the difference in relative testosterone level between less-masculine human males  
12 and domesticated male animals. The question is, if masculine traits are influenced in the same  
13 way as domesticated ones, why would testosterone tend to be lower in less-masculine men,  
14 but higher in domesticated animals? If domestication syndrome is effectively an expression  
15 of relatively dampened physiological masculinity, it seems we would expect lower  
16 testosterone in both less-masculine men and in domesticated taxa as compared to more  
17 masculine and non-domesticated comparators. As proposed earlier, it may be that levels of  
18 testosterone production are determined separately to the other, more structural, features of  
19 masculinity and that androgen receptors in NCC-derived tissues are the primary mode of  
20 variance in both masculinity and in domestication. However, whilst this possibility de-  
21 emphasises the direct role of testosterone in human self-domestication, it remains a curiosity  
22 that testosterone levels would not appear to shift in the same direction in less-masculine self-  
23 domesticated humans as they do in domesticated animals.

24 Another outstanding issue involves the regular lack of precise correlation across masculine  
25 traits in men. That is, if trait expression is reliably correlated in NCC-derived features, why  
26 would men show varying levels of masculinity in different features? For instance, why do  
27 some men have deep voices but not large jaws, and vice versa? Why do some show a facial  
28 dermis with potential for dense facial hair, but no propensity for reactive behaviour? This  
29 lack of correlation may well indicate a fundamental flaw in the hypothesis or might simply  
30 demonstrate that perfect correlation is unlikely in biology. It may be that costly production of  
31 androgen receptors necessitates optimised distributions and that different lineages invest in  
32 different masculine signalling strategies. This issue would require further study.



## Masculinity and the mechanisms of human self-domestication—Ben Gleeson

1 To expand empirical investigation of human self-domestication, further research into the  
2 activity of NCCs, and the genetic, or epigenetic, factors that regulate their proliferation, are  
3 likely to prove insightful. A range of recent sources have considered the genetics of  
4 domestication syndrome and these may be utilised as foundations for further investigation  
5 (Benítez-Burraco, Lattanzi, & Murphy, 2016; Benítez-Burraco, Pietro, Barba, & Lattanzi,  
6 2017; Benítez-Burraco, Theofanopoulou, & Boeckx, 2016; Theofanopoulou et al., 2017;  
7 Wilkins et al., 2014; Wright, 2015). Note though that the findings of this present review  
8 suggest value in an expanded focus on genetic regulatory mechanisms associated with  
9 masculinity in general, and on androgen receptor densities in NCC-derived cells and tissues  
10 in particular. Due to the ubiquitous nature of vertebrate NCCs, useful investigation might  
11 initially progress via non-human research since the mechanisms involved in male secondary  
12 traits should influence embryonic NCCs across most vertebrate taxa.

13 Whilst Wilkens et al. (2014) drew links between the domestication process and pathological  
14 features common to various forms of neurocristopathy, other researchers have investigated  
15 similarities between domestication and pathologies associated with variation in the language  
16 centres of the human brain. These suggest that both autism spectrum disorder and  
17 schizophrenia could occur in response to physiological activity related to mechanisms of self-  
18 domestication (Benítez-Burraco, 2017; Benítez-Burraco, Lattanzi, et al., 2016; Benítez-  
19 Burraco et al., 2017). Recent demonstration of craniofacial hypermasculinisation associated  
20 with autism spectrum disorder (Tan et al., 2017)—a syndrome disproportionately associated  
21 with human males—may prove directly relevant in light of the relationship between  
22 domestication and masculine phenotypes proposed in the present article. These connections  
23 might suggest productive investigation of testosterone-moderating developmental  
24 interventions targeted towards several autism related symptoms. Apart from facial  
25 hypermasculinisation, a link between self-domestication and autism would predict for other  
26 correlated symptoms including larger brains and adrenal systems in autistic individuals.

27 A further useful focus for expanded research in domestication and human self-domestication  
28 would be to conclusively demonstrate underlying mechanisms causing noted hypoplasia of  
29 NCC-derived tissues in domesticates. If moderated in-situ proliferation or growth of NCCs in  
30 response to testosterone presence were the general mechanism of domestication, then further  
31 work is required to determine exactly why, and by what means, this interaction occurs. Based  
32 on combination of suggestions provided by Wilkins et al. (2014) and Cieri et al. (2014), this

## Masculinity and the mechanisms of human self-domestication—Ben Gleeson

1 article has hypothesised inherited modification of androgen receptor densities within NCCs,  
2 or NCC-derived tissues, as an influential mechanism. Having said this, endocrine interactions  
3 involved in the regulation and metabolism of testosterone are highly complex, and further  
4 investigation of these relationships will be required. The specific influence of NCC-derived  
5 cells in the pituitary upon the operation of the HPG axis and its active role in testosterone  
6 production also remains to be considered and thoroughly explored, especially in light of the  
7 inconsistencies between masculine men and male domesticates, noted above.

8 The observations presented in this article offer potential for further productive research by a  
9 range of methods appropriate to multiple fields of investigation. Table 4 specifies several  
10 initial predictions that might stimulate further examination and testing of domestication-  
11 related mechanisms.

12 **Table 3:** Six predictions derived from hypothesised mechanisms presented here.

---

1) Androgen receptor densities within NCC-derived tissues should vary between relatively domesticated and non-domesticated lineages and between high and low masculinity individuals, with the domestic/low state showing relative reduction.

---

2) Whilst the introduction of exogenous testosterone has been shown to enhance masculine trait expression, natural testosterone levels should provide only an imprecise predictor of masculine morphology and behaviour (meta-analyses could be used to examine this logical expectation).

---

3) Relative sizes of male adrenal gland should correlate with behavioural reactivity and other NCC-derived or influenced masculine traits and features.

---

4) Selection against a range of masculine traits or features in vertebrate species (e.g. against species-specific masculine behaviour, colourations, or ornaments) should promote correlated changes in other NCC-derived features, as apparent under domestication syndrome.

---

5) Reduced colouration and low territorial aggression in island populations (Mayr, 1966; Stamps & Buechner, 1985), are likely indications of ‘island self-domestication’ as proposed by Hare et al. (2012), and should correlate with other indicators of altered NCC function in comparison to mainland relatives.

---

6) NCC-derived structures (e.g. the hyoid, see: Torimitsu et al., 2017) should prove particularly useful for accurate sex determination within populations of related individuals.

---

### 13 **8. Conclusion**

14 Across multiple taxa, numerous signals of masculinity result from embryonic neural crest cell  
15 progenitors. Since domestication syndrome occurs as a biophysical response to selection for  
16 sociability and involves correlated change in numerous NCC-derived tissues, correlations  
17 between NCCs and masculine traits should help to link existing sexual selection research

## Masculinity and the mechanisms of human self-domestication—Ben Gleeson

1 with longstanding interest in the processes of domestication, and human self-domestication.  
2 These connections might help to inform further investigation of varying female preference for  
3 masculine features in multiple vertebrate taxa (i.e. by extending ‘handicap’ and ‘costly  
4 signalling’ studies). In a wider sense, the mechanisms of testosterone-mediated NCC  
5 proliferation and growth may promote a range of further investigation and discussion around  
6 masculine morphology, physiology and behaviour.

7 The self-domestication of *Homo sapiens* has been characterized as a necessary process in our  
8 evolution towards a more cooperative and sociable form; promoting the development of  
9 human culture, knowledge sharing, and dramatic technological advance (Cieri et al., 2014;  
10 Hare, 2017). The increased collaborative capacity and cooperation enabled by this process  
11 allowed for the emergence of humanity’s complex and constructed ‘social-niche’-based mode  
12 of existence (e.g. see: Ellis, 2015; Odling-Smee, Laland, & Feldman, 2003; Sterelny, 2011).  
13 Given the relatively recent increase in social and technological complexity accompanying the  
14 emergence of human civilizations, the strongest impacts of this process have emerged only  
15 lately in our evolution. This might imply human self-domestication is a continuing (even  
16 accelerating) process. However, the complex range of influential biological, cultural, and  
17 environmental factors occurring within modern society make any overall trend difficult to  
18 predict. Further research regarding selection on human masculinity should proceed with an  
19 enhanced paradigmatic foundation via reference to testosterone-mediated NCC proliferation,  
20 and a broader understanding of its effects upon human biology and behaviour, as individuals,  
21 and as a society.

22

### 23 **Acknowledgements**

24

### 25 **References**

- 26 Alberch, P., Gould, S. J., Oster, G. F., & Wake, D. B. (1979). Size and shape in ontogeny and  
27 phylogeny. *Paleobiology*, 5(3), 296–317.  
28 <https://doi.org/10.1017/S0094837300006588>  
29 Alexander, R. D. (1990). *How Did Humans Evolve? Reflections on the Uniquely Unique*  
30 *Species* (Vol. 1). Museum of Zoology, University of Michigan.

Masculinity and the mechanisms of human self-domestication—Ben Gleeson

- 1 Alvergne, A., Faurie, C., & Raymond, M. (2009). Variation in testosterone levels and male  
2 reproductive effort: Insight from a polygynous human population. *Hormones and*  
3 *Behavior*, 56(5), 491–497. <https://doi.org/10.1016/j.yhbeh.2009.07.013>
- 4 Archer, J. (2009). Does sexual selection explain human sex differences in aggression?  
5 *Behavioral and Brain Sciences*, 32(3–4), 249–66; discussion 266–311.  
6 <https://doi.org/http://dx.doi.org.virtual.anu.edu.au/10.1017/S0140525X09990951>
- 7 Balolia, K. L., Soligo, C., & Lockwood, C. A. (2013). Sexual Dimorphism and Facial Growth  
8 Beyond Dental Maturity in Great Apes and Gibbons. *International Journal of*  
9 *Primatology*, 34(2), 361–387. <https://doi.org/10.1007/s10764-013-9666-z>
- 10 Balolia, K. L., Soligo, C., & Wood, B. (2017). Sagittal crest formation in great apes and  
11 gibbons. *Journal of Anatomy*, 230(6), 820–832. <https://doi.org/10.1111/joa.12609>
- 12 Barrett, R. L., & Harris, E. F. (1993). Anabolic steroids and craniofacial growth in the rat.  
13 *The Angle Orthodontist*, 63(4), 289–298. [https://doi.org/10.1043/0003-](https://doi.org/10.1043/0003-3219(1993)063<0289:ASACGI>2.0.CO;2)  
14 [3219\(1993\)063<0289:ASACGI>2.0.CO;2](https://doi.org/10.1043/0003-3219(1993)063<0289:ASACGI>2.0.CO;2)
- 15 Belyaev, D. K. (1979). Destabilizing selection as a factor in domestication. *Journal of*  
16 *Heredity*, 70(5), 301–308.
- 17 Benítez-Burraco, A. (2017). Grammaticalization and language evolution: Focusing the  
18 debate. *Language Sciences*, 63(Supplement C), 60–68.  
19 <https://doi.org/10.1016/j.langsci.2017.03.003>
- 20 Benítez-Burraco, A., Lattanzi, W., & Murphy, E. (2016). Language Impairments in ASD  
21 Resulting from a Failed Domestication of the Human Brain. *Frontiers in*  
22 *Neuroscience*, 10. <https://doi.org/10.3389/fnins.2016.00373>
- 23 Benítez-Burraco, A., Pietro, L. D., Barba, M., & Lattanzi, W. (2017). Schizophrenia and  
24 Human Self-Domestication: An Evolutionary Linguistics Approach. *Brain, Behavior*  
25 *and Evolution*, 89(3), 162–184. <https://doi.org/10.1159/000468506>

Masculinity and the mechanisms of human self-domestication—Ben Gleeson

- 1 Benítez-Burraco, A., Theofanopoulou, C., & Boeckx, C. (2016). Globularization and  
2 Domestication. *Topoi*, 1–14. <https://doi.org/10.1007/s11245-016-9399-7>
- 3 Bhatt, S., Diaz, R., & Trainor, P. A. (2013). Signals and Switches in Mammalian Neural  
4 Crest Cell Differentiation. *Cold Spring Harbor Perspectives in Biology*, 5(2).  
5 <https://doi.org/10.1101/cshperspect.a008326>
- 6 Boehm, C. (2012). *Moral Origins: The Evolution of Virtue, Altruism, and Shame*. Basic  
7 Books.
- 8 Boehm, C. (2014). The moral consequences of social selection. *Behaviour*, 151(2–3), 167–  
9 183. <https://doi.org/10.1163/1568539X-00003143>
- 10 Boothroyd, L. G., Gray, A. W., Headland, T. N., Uehara, R. T., Waynforth, D., Burt, D. M.,  
11 & Pound, N. (2017). Male Facial Appearance and Offspring Mortality in Two  
12 Traditional Societies. *PLoS One; San Francisco*, 12(1).  
13 <https://doi.org/http://dx.doi.org/10.1371/journal.pone.0169181>
- 14 Brace, C. L., Rosenberg, K. R., & Hunt, K. D. (1987). Gradual Change in Human Tooth Size  
15 in the Late Pleistocene and Post- Pleistocene. *Evolution*, 41(4), 705–720.  
16 <https://doi.org/10.2307/2408882>
- 17 Brace, C. L., & Ryan, A. S. (1980). Sexual dimorphism and human tooth size differences.  
18 *Journal of Human Evolution*, 9(5), 417–435. [https://doi.org/10.1016/0047-](https://doi.org/10.1016/0047-2484(80)90051-2)  
19 [2484\(80\)90051-2](https://doi.org/10.1016/0047-2484(80)90051-2)
- 20 Brooks, R., Scott, I. M., Maklakov, A. A., Kasumovic, M. M., Clark, A. P., & Penton-Voak,  
21 I. S. (2010). National income inequality predicts women’s preferences for  
22 masculinized faces better than health does. *Proceedings of the Royal Society of*  
23 *London B: Biological Sciences*, rspb20100964.  
24 <https://doi.org/10.1098/rspb.2010.0964>



Masculinity and the mechanisms of human self-domestication—Ben Gleeson

- 1 Brüne, M. (2007). On human self-domestication, psychiatry, and eugenics. *Philosophy,*  
2 *Ethics, and Humanities in Medicine*, 2(1), 21. <https://doi.org/10.1186/1747-5341-2-21>
- 3 Burkart, J. M., Allon, O., Amici, F., Fichtel, C., Finkenwirth, C., Heschl, A., ... van Schaik,  
4 C. P. (2014). The evolutionary origin of human hyper-cooperation. *Nature*  
5 *Communications*, 5, 4747. <https://doi.org/10.1038/ncomms5747>
- 6 Burkart, J. M., Hrdy, S. B., & Van Schaik, C. P. (2009). Cooperative breeding and human  
7 cognitive evolution. *Evolutionary Anthropology: Issues, News, and Reviews*, 18(5),  
8 175–186. <https://doi.org/10.1002/evan.20222>
- 9 Burnham, T. ., Chapman, J. F., Gray, P. ., McIntyre, M. ., Lipson, S. ., & Ellison, P. . (2003).  
10 Men in committed, romantic relationships have lower testosterone. *Hormones and*  
11 *Behavior*, 44(2), 119–122. [https://doi.org/10.1016/S0018-506X\(03\)00125-9](https://doi.org/10.1016/S0018-506X(03)00125-9)
- 12 Calcagno, J. M., & Gibson, K. R. (1988). Human dental reduction: Natural selection or the  
13 probable mutation effect. *American Journal of Physical Anthropology*, 77(4), 505–  
14 517. <https://doi.org/10.1002/ajpa.1330770411>
- 15 Carré, J. M., McCormick, C. M., & Mondloch, C. J. (2009). Facial Structure Is a Reliable  
16 Cue of Aggressive Behavior. *Psychological Science*, 20(10), 1194–1198.  
17 <https://doi.org/10.1111/j.1467-9280.2009.02423.x>
- 18 Carrier, D. R., & Morgan, M. H. (2015). Protective buttressing of the hominin face.  
19 *Biological Reviews*, 90(1), 330–346. <https://doi.org/10.1111/brv.12112>
- 20 Cieri, R. L., Churchill, S. E., Franciscus, R. G., Tan, J., & Hare, B. (2014). Craniofacial  
21 Feminization, Social Tolerance, and the Origins of Behavioral Modernity. *Current*  
22 *Anthropology*, 55(4), 419–443. <https://doi.org/10.1086/677209>
- 23 Clutton-Brock, T. H., Hodge, S. J., Spong, G., Russell, A. F., Jordan, N. R., Bennett, N. C.,  
24 ... Manser, M. B. (2006). Intrasexual competition and sexual selection in cooperative

Masculinity and the mechanisms of human self-domestication—Ben Gleeson

- 1 mammals. *Nature; London*, 444(7122), 1065–1068.
- 2 <https://doi.org/http://dx.doi.org.virtual.anu.edu.au/10.1038/nature05386>
- 3 Cordero, D. R., Brugmann, S., Chu, Y., Bajpai, R., Jame, M., & Helms, J. A. (2011). Cranial  
4 neural crest cells on the move: Their roles in craniofacial development. *American*  
5 *Journal of Medical Genetics Part A*, 155(2), 270–279.  
6 <https://doi.org/10.1002/ajmg.a.33702>
- 7 Darwin, C. (1859). *On the Origin of Species by Means of Natural Selection, Or, The*  
8 *Preservation of Favoured Races in the Struggle for Life*. London: John Murray.
- 9 Darwin, C. (1868). *The variation of animals and plants under domestication*. London: John  
10 Murray.
- 11 Darwin, C. (1871). *The descent of man: and selection in relation to sex*. London.
- 12 Davis, E. B., Brakora, K. A., & Lee, A. H. (2011). Evolution of ruminant headgear: a review.  
13 *Proceedings: Biological Sciences*, 278(1720), 2857–2865.
- 14 DeBruine, L. M., Jones, B. C., Crawford, J. R., Welling, L. L. M., & Little, A. C. (2010). The  
15 health of a nation predicts their mate preferences: cross-cultural variation in women’s  
16 preferences for masculinized male faces. *Proceedings of the Royal Society B:*  
17 *Biological Sciences*, 277(1692), 2405–2410. <https://doi.org/10.1098/rspb.2009.2184>
- 18 DeBruine, L. M., Jones, B. C., Frederick, D. A., Haselton, M. G., Penton-Voak, I. S., &  
19 Perrett, D. I. (2010). Evidence for Menstrual Cycle Shifts in Women’s Preferences for  
20 Masculinity: A Response to Harris (in Press) “Menstrual Cycle and Facial Preferences  
21 Reconsidered.” *Evolutionary Psychology*, 8(4), 147470491000800420.  
22 <https://doi.org/10.1177/147470491000800416>
- 23 Dixson, B. J. (2016). Masculinity and Femininity. In T. K. Shackelford & V. A. Weekes-  
24 Shackelford (Eds.), *Encyclopedia of Evolutionary Psychological Science*. Springer  
25 International Publishing. Retrieved from DOI 10.1007/978-3-319-16999-6\_3389-1

Masculinity and the mechanisms of human self-domestication—Ben Gleeson

- 1 Dixson, B. J., & Brooks, R. C. (2013). The role of facial hair in women's perceptions of  
2 men's attractiveness, health, masculinity and parenting abilities. *Evolution and*  
3 *Human Behavior*, 34(3), 236–241.  
4 <https://doi.org/10.1016/j.evolhumbehav.2013.02.003>
- 5 Dixson, B. J., Lee, A. J., Sherlock, J. M., & Talamas, S. N. (2017). Beneath the beard: do  
6 facial morphometrics influence the strength of judgments of men's beardedness?  
7 *Evolution and Human Behavior*, 38(2), 164–174.  
8 <https://doi.org/10.1016/j.evolhumbehav.2016.08.004>
- 9 Dixson, B. J., Rantala, M. J., Melo, E. F., & Brooks, R. C. (2017). Beards and the big city:  
10 displays of masculinity may be amplified under crowded conditions. *Evolution and*  
11 *Human Behavior*, 38(2), 259–264.  
12 <https://doi.org/10.1016/j.evolhumbehav.2016.10.009>
- 13 Dubuc, C., Allen, W. L., Maestriperi, D., & Higham, J. P. (2014). Is male rhesus macaque  
14 red color ornamentation attractive to females? *Behavioral Ecology and Sociobiology*,  
15 68(7), 1215–1224. <https://doi.org/10.1007/s00265-014-1732-9>
- 16 Dunkel, L. P., Arora, N., van Noordwijk, M. A., Atmoko, S. S. U., Putra, A. P., Krützen, M.,  
17 & van Schaik, C. P. (2013). Variation in developmental arrest among male  
18 orangutans: a comparison between a Sumatran and a Bornean population. *Frontiers in*  
19 *Zoology*, 10, 12. <https://doi.org/10.1186/1742-9994-10-12>
- 20 Ellis, E. C. (2015). Ecology in an anthropogenic biosphere. *Ecological Monographs*, 85(3),  
21 287–331. <https://doi.org/10.1890/14-2274.1>
- 22 Ericsson, R., Knight, R., & Johanson, Z. (2013). Evolution and development of the vertebrate  
23 neck. *Journal of Anatomy*, 222(1), 67–78. [https://doi.org/10.1111/j.1469-](https://doi.org/10.1111/j.1469-7580.2012.01530.x)  
24 [7580.2012.01530.x](https://doi.org/10.1111/j.1469-7580.2012.01530.x)

Masculinity and the mechanisms of human self-domestication—Ben Gleeson

- 1 Evans, M. R., Goldsmith, A. R., & Norris, S. R. A. (2000). The Effects of Testosterone on  
2 Antibody Production and Plumage Coloration in Male House Sparrows (*Passer*  
3 *domesticus*). *Behavioral Ecology and Sociobiology*, *47*(3), 156–163.  
4 <https://doi.org/10.2307/4601725>
- 5 Feinberg, D. R., DeBruine, L. M., Jones, B. C., & Little, A. C. (2008). Correlated preferences  
6 for men’s facial and vocal masculinity. *Evolution and Human Behavior*, *29*(4), 233–  
7 241. <https://doi.org/10.1016/j.evolhumbehav.2007.12.008>
- 8 Fink, B., Weege, B., Manning, J. T., & Trivers, R. (2014). Body symmetry and physical  
9 strength in human males: Body Symmetry and Physical Strength in Human MaleS.  
10 *American Journal of Human Biology*, *26*(5), 697–700.  
11 <https://doi.org/10.1002/ajhb.22584>
- 12 Fischer, E. (1914). Die Rassenmerkmale des Menschen als Domesticationserscheinungen.  
13 *Zeitschrift Für Morphologie Und Anthropologie*, *18*, 479–524.
- 14 Flinn, M. V., Geary, D. C., & Ward, C. V. (2005). Ecological dominance, social competition,  
15 and coalitionary arms races: Why humans evolved extraordinary intelligence.  
16 *Evolution and Human Behavior*, *26*(1), 10–46.  
17 <https://doi.org/10.1016/j.evolhumbehav.2004.08.005>
- 18 Franciscus, R. G., Maddux, S. D., & Schmidt, K. W. (2013). Anatomically modern humans  
19 as a “self-domesticated” species: insights from ancestral wolves and descendant dogs.  
20 Presented at the 82nd Annual Meeting of the American Association of Physical  
21 Anthropologists, Knoxville, Tennessee, Knoxville, Tennessee.
- 22 Frayer, D. W. (1980). Sexual dimorphism and cultural evolution in the Late Pleistocene and  
23 Holocene of Europe. *Journal of Human Evolution*, *9*(5), 399–415.  
24 [https://doi.org/10.1016/0047-2484\(80\)90050-0](https://doi.org/10.1016/0047-2484(80)90050-0)

Masculinity and the mechanisms of human self-domestication—Ben Gleeson

- 1 Frayer, D. W., & Wolpoff, M. H. (1985). Sexual Dimorphism. *Annual Review of*  
2 *Anthropology*, 14(1), 429–473. <https://doi.org/10.1146/annurev.an.14.100185.002241>
- 3 Furuichi, T. (2011). Female contributions to the peaceful nature of bonobo society.  
4 *Evolutionary Anthropology*, 20(4), 131–142. <https://doi.org/10.1002/evan.20308>
- 5 Gangestad, S. W., & Thornhill, R. (2008). Human Oestrus. *Proceedings: Biological Sciences*,  
6 275(1638), 991–1000.
- 7 Gilbert, S. F. (2010). *Developmental biology* (9th ed). Sunderland, MA: Sinauer Associates.
- 8 Gould, S. J. (1966). Allometry and Size in Ontogeny and Phylogeny. *Biological Reviews*,  
9 41(4), 587–638. <https://doi.org/10.1111/j.1469-185X.1966.tb01624.x>
- 10 Gould, S. J. (1977). *Ontogeny and Phylogeny*. Cambridge, Mass.: Harvard University Press.  
11 Retrieved from <http://www.hup.harvard.edu/catalog.php?isbn=9780674639416>
- 12 Groves, C. (1989). *A Theory of Human and Primate Evolution*. Oxford and New York:  
13 Oxford University Press, USA.
- 14 Groves, C. (1999). The advantages and disadvantages of being domesticated. *Perspectives in*  
15 *Human Biology*, 4(1), 1–12.
- 16 Hall, B. K. (2000). The neural crest as a fourth germ layer and vertebrates as quadroblastic  
17 not triploblastic. *Evolution & Development*, 2(1), 3–5. [https://doi.org/10.1046/j.1525-](https://doi.org/10.1046/j.1525-142x.2000.00032.x)  
18 [142x.2000.00032.x](https://doi.org/10.1046/j.1525-142x.2000.00032.x)
- 19 Hall, B. K. (2008). The neural crest and neural crest cells: discovery and significance for  
20 theories of embryonic organization. *Journal of Biosciences; Dordrecht*, 33(5), 781–  
21 793. <https://doi.org/http://dx.doi.org.virtual.anu.edu.au/10.1007/s12038-008-0098-4>
- 22 Hall, J. E. (2010). *Guyton and Hall Textbook of Medical Physiology* (12th edition).  
23 Philadelphia, Pa: Saunders.



Masculinity and the mechanisms of human self-domestication—Ben Gleeson

- 1 Hare, B. (2017). Survival of the Friendliest: Homo sapiens Evolved via Selection for  
2 Prosociality. *Annual Review of Psychology*, 68(1). [https://doi.org/10.1146/annurev-  
4 psych-010416-044201](https://doi.org/10.1146/annurev-<br/>3 psych-010416-044201)
- 4 Hare, B., Wobber, V., & Wrangham, R. W. (2012). The self-domestication hypothesis:  
5 Evolution of bonobo psychology is due to selection against aggression. *Animal  
6 Behaviour*, 83(3), 573–585. <https://doi.org/10.1016/j.anbehav.2011.12.007>
- 7 Harris, C. R. (2013). Shifts in Masculinity Preferences Across the Menstrual Cycle: Still Not  
8 There. *Sex Roles; New York*, 69(9–10), 507–515.  
9 <https://doi.org/http://dx.doi.org.virtual.anu.edu.au/10.1007/s11199-012-0229-0>
- 10 Hawkes, K. (2013). Primate Sociality to Human Cooperation: Why Us and Not Them?  
11 *Human Nature*, 25(1), 28–48. <https://doi.org/10.1007/s12110-013-9184-x>
- 12 Heck, H. (1951). The Breeding-Back of the Aurochs. *Oryx*, 1(3), 117–122.  
13 <https://doi.org/10.1017/S0030605300035286>
- 14 Helmer, D., Goucherin, L., Monchot, H., Peters, J., & Sana Segui, M. (2002). Identifying  
15 domestic cattle from early Neolithic sites on the Middle Euphrates with the help of  
16 sex determination. In J. D. Vigne, J. Peters, & D. Helmer (Eds.), *The First Steps of  
17 Animal Domestication* (pp. 86–95). Durham: Oxbow Books.
- 18 Hemmer, H. (1990). *Domestication: The Decline of Environmental Appreciation*. Cambridge,  
19 U.K.: Cambridge University Press.
- 20 Henneberg, M. (1988). Decrease of Human Skull Size in the Holocene. *Human Biology*,  
21 60(3), 395–405.
- 22 Henneberg, M., & Steyn, M. (1993). Trends in cranial capacity and cranial index in  
23 Subsaharan Africa during the Holocene. *American Journal of Human Biology*, 5(4),  
24 473–479. <https://doi.org/10.1002/ajhb.1310050411>

Masculinity and the mechanisms of human self-domestication—Ben Gleeson

- 1 Hill, A. K., Bailey, D. H., & Puts, D. A. (2017). Chapter 15 - Gorillas in Our Midst? Human  
2 Sexual Dimorphism and Contest Competition in Men. In F. J. Ayala (Ed.), *On Human*  
3 *Nature* (pp. 235–249). San Diego: Academic Press. Retrieved from  
4 <http://www.sciencedirect.com/science/article/pii/B9780124201903000156>
- 5 Hodges-Simeon, C. R., Sobraske, K. N. H., Samore, T., Gurven, M., & Gaulin, S. J. C.  
6 (2016). Facial Width-To-Height Ratio (fWHR) Is Not Associated with Adolescent  
7 Testosterone Levels. *PLOS ONE*, *11*(4), e0153083.  
8 <https://doi.org/10.1371/journal.pone.0153083>
- 9 Hrdy, S. B. (2011). *Mothers and Others: The Evolutionary Origins of Mutual Understanding*.  
10 Cambridge, Mass.: The Belknap Press.
- 11 Jensen, P. (2006). Domestication—From behaviour to genes and back again. *Applied Animal*  
12 *Behaviour Science*, *97*(1), 3–15. <https://doi.org/10.1016/j.applanim.2005.11.015>
- 13 Jinno, H., Morozova, O., Jones, K. L., Biernaskie, J. A., Paris, M., Hosokawa, R., ... Miller,  
14 F. D. (2010). Convergent Genesis of an Adult Neural Crest-Like Dermal Stem Cell  
15 from Distinct Developmental Origins. *STEM CELLS*, *28*(11), 2027–2040.  
16 <https://doi.org/10.1002/stem.525>
- 17 Kappelman, J. (1996). The evolution of body mass and relative brain size in fossil hominids.  
18 *Journal of Human Evolution*, *30*(3), 243–276. <https://doi.org/10.1006/jhev.1996.0021>
- 19 Katz, L. S. (2007). Sexual behavior of domesticated ruminants. *Hormones and Behavior*,  
20 *52*(1), 56–63. <https://doi.org/10.1016/j.yhbeh.2007.03.012>
- 21 Knight, R. D., & Schilling, T. F. (2013). *Cranial Neural Crest and Development of the Head*  
22 *Skeleton*. Landes Bioscience. Retrieved from  
23 <https://www.ncbi.nlm.nih.gov/books/NBK6075/>
- 24 Krause, M. P., Dworski, S., Feinberg, K., Jones, K., Johnston, A. P. W., Paul, S., ... Miller,  
25 F. D. (2014). Direct Genesis of Functional Rodent and Human Schwann Cells from

Masculinity and the mechanisms of human self-domestication—Ben Gleeson

- 1 Skin Mesenchymal Precursors. *Stem Cell Reports*, 3(1), 85–100.  
2 <https://doi.org/10.1016/j.stemcr.2014.05.011>
- 3 Kruger, D. J. (2006). Male facial masculinity influences attributions of personality and  
4 reproductive strategy. *Personal Relationships*, 13(4), 451–463.  
5 <https://doi.org/10.1111/j.1475-6811.2006.00129.x>
- 6 Kruska, D. (1988). Mammalian Domestication and its Effect on Brain Structure and  
7 Behavior. In H. J. Jerison & I. Jerison (Eds.), *Intelligence and Evolutionary Biology*  
8 (pp. 211–250). Springer Berlin Heidelberg. [https://doi.org/10.1007/978-3-642-70877-](https://doi.org/10.1007/978-3-642-70877-0_13)  
9 [0\\_13](https://doi.org/10.1007/978-3-642-70877-0_13)
- 10 Künzl, C., & Sachser, N. (1999). The Behavioral Endocrinology of Domestication: A  
11 Comparison between the Domestic Guinea Pig (*Cavia apereaf.porcellus*) and Its Wild  
12 Ancestor, the Cavy (*Cavia aperea*). *Hormones and Behavior*, 35(1), 28–37.  
13 <https://doi.org/10.1006/hbeh.1998.1493>
- 14 Leach, H. M. (2003). Human Domestication Reconsidered. *Current Anthropology*, 44(3),  
15 349–368. <https://doi.org/10.1086/368119>
- 16 Leach, H. M. (2007). Selection and the Unforeseen Consequences of Domestication. In  
17 *Where the Wild Things Are Now: Domestication Reconsidered*. Oxford and New  
18 York: Berg.
- 19 Lee, A. J., Brooks, R. C., Potter, K. J., & Zietsch, B. P. (2015). Pathogen disgust sensitivity  
20 and resource scarcity are associated with mate preference for different waist-to-hip  
21 ratios, shoulder-to-hip ratios, and body mass index. *Evolution and Human Behavior*,  
22 36(6), 480–488. <https://doi.org/10.1016/j.evolhumbehav.2015.07.002>
- 23 Lefevre, C. E., Lewis, G. J., Perrett, D. I., & Penke, L. (2013). Telling facial metrics: facial  
24 width is associated with testosterone levels in men. *Evolution and Human Behavior*,  
25 34(4), 273–279. <https://doi.org/10.1016/j.evolhumbehav.2013.03.005>

Masculinity and the mechanisms of human self-domestication—Ben Gleeson

- 1 Lincoln, G. A., Lincoln, C. E., & McNeilly, A. S. (1990). Seasonal cycles in the blood  
2 plasma concentration of FSH, inhibin and testosterone, and testicular size in rams of  
3 wild, feral and domesticated breeds of sheep. *Journal of Reproduction and Fertility*,  
4 88(2), 623–633. <https://doi.org/10.1530/jrf.0.0880623>
- 5 Lindenfors, P., & Tullberg, B. S. (2011). Evolutionary Aspects of Aggression. *Aggression*,  
6 75, 7–22. <https://doi.org/10.1016/B978-0-12-380858-5.00009-5>
- 7 Little, A. C., Connely, J., Feinberg, D. R., Jones, B. C., & Roberts, S. C. (2011). Human  
8 preference for masculinity differs according to context in faces, bodies, voices, and  
9 smell. *Behavioral Ecology*, 22(4), 862–868. <https://doi.org/10.1093/beheco/arr061>
- 10 Little, A. C., DeBruine, L. M., & Jones, B. C. (2010). Exposure to visual cues of pathogen  
11 contagion changes preferences for masculinity and symmetry in opposite-sex faces.  
12 *Proceedings of the Royal Society of London B: Biological Sciences*, rspb20101925.  
13 <https://doi.org/10.1098/rspb.2010.1925>
- 14 Little, A. C., Jones, B. C., & Burriss, R. P. (2007). Preferences for masculinity in male bodies  
15 change across the menstrual cycle. *Hormones and Behavior*, 51(5), 633–639.  
16 <https://doi.org/10.1016/j.yhbeh.2007.03.006>
- 17 Little, A. C., Saxton, T. K., Roberts, S. C., Jones, B. C., DeBruine, L. M., Vukovic, J., ...  
18 Chenore, T. (2010). Women's preferences for masculinity in male faces are highest  
19 during reproductive age range and lower around puberty and post-menopause.  
20 *Psychoneuroendocrinology*, 35(6), 912–920.  
21 <https://doi.org/10.1016/j.psyneuen.2009.12.006>
- 22 Liu, C., Tang, Y., Ge, H., Wang, F., Sun, H., Meng, H., ... Liu, S. (2014). Increasing breadth  
23 of the frontal lobe but decreasing height of the human brain between two Chinese  
24 samples from a Neolithic site and from living humans. *American Journal of Physical*  
25 *Anthropology*, 154(1), 94–103. <https://doi.org/10.1002/ajpa.22476>

Masculinity and the mechanisms of human self-domestication—Ben Gleeson

- 1 Lorenz, K. (1940). Durch Domestikation verursachte Störungen arteigenen Verhaltens. *Z*  
2 *Angw Psychol Charakterk*, 59, 2–81.
- 3 Marečková, K., Weinbrand, Z., Chakravarty, M. M., Lawrence, C., Aleong, R., Leonard, G.,  
4 ... Paus, T. (2011). Testosterone-mediated sex differences in the face shape during  
5 adolescence: Subjective impressions and objective features. *Hormones and Behavior*,  
6 60(5), 681–690. <https://doi.org/10.1016/j.yhbeh.2011.09.004>
- 7 Marshall, F. B., Dobney, K., Denham, T., & Capriles, J. M. (2014). Evaluating the roles of  
8 directed breeding and gene flow in animal domestication. *Proceedings of the National*  
9 *Academy of Sciences*, 111(17), 6153–6158. <https://doi.org/10.1073/pnas.1312984110>
- 10 Matsuoka, T., Ahlberg, P. E., Kessar, N., Iannarelli, P., Dennehy, U., Richardson, W. D., ...  
11 Koentges, G. (2005). Neural Crest Origins of the Neck and Shoulder. *Nature*,  
12 436(7049), 347–355. <https://doi.org/10.1038/nature03837>
- 13 Mayr, E. (1966). *Animal Species and Evolution*. Cambridge, Massachusetts: Harvard  
14 University Press. Retrieved from  
15 <http://www.hup.harvard.edu/catalog.php?isbn=9780674865327>
- 16 McGonnell, I. M., McKay, I. J., & Graham, A. (2001). A Population of Caudally Migrating  
17 Cranial Neural Crest Cells: Functional and Evolutionary Implications. *Developmental*  
18 *Biology*, 236(2), 354–363. <https://doi.org/10.1006/dbio.2001.0330>
- 19 Mishina, Y., & Snider, T. N. (2014). Neural crest cell signaling pathways critical to cranial  
20 bone development and pathology. *Experimental Cell Research*, 325(2), 138–147.  
21 <https://doi.org/10.1016/j.yexcr.2014.01.019>
- 22 Mitteroecker, P., Windhager, S., Müller, G. B., & Schaefer, K. (2015). The Morphometrics of  
23 “Masculinity” in Human Faces: e0118374. *PLoS One*, 10(2).  
24 <https://doi.org/http://dx.doi.org/10.1371/journal.pone.0118374>

Masculinity and the mechanisms of human self-domestication—Ben Gleeson

- 1 Noden, D. M. (1986). Patterning of avian craniofacial muscles. *Developmental Biology*,  
2 116(2), 347–356. [https://doi.org/10.1016/0012-1606\(86\)90138-7](https://doi.org/10.1016/0012-1606(86)90138-7)
- 3 Odling-Smee, F. J., Laland, K. N., & Feldman, M. W. (2003). *Niche Construction: The*  
4 *Neglected Process in Evolution*. Princeton: Princeton University Press.
- 5 Penton-Voak, I. S., & Chen, J. Y. (2004). High salivary testosterone is linked to masculine  
6 male facial appearance in humans. *Evolution and Human Behavior*, 25(4), 229–241.  
7 <https://doi.org/10.1016/j.evolhumbehav.2004.04.003>
- 8 Penton-Voak, I. S., Perrett, D. I., Castles, D. L., Kobayashi, T., Burt, D. M., Murray, L. K., &  
9 Minamisawa, R. (1999). Menstrual cycle alters face preference. *Nature*, 399(6738),  
10 741–742. <https://doi.org/10.1038/21557>
- 11 Pinker, S. (2011). *The Better Angels of our Nature*. New York: Viking.
- 12 Prum, R. O., & Torres, R. H. (2004). Structural colouration of mammalian skin: convergent  
13 evolution of coherently scattering dermal collagen arrays. *Journal of Experimental*  
14 *Biology*, 207(12), 2157–2172. <https://doi.org/10.1242/jeb.00989>
- 15 Puts, D. A., Gaulin, S., & Verdolini, K. (2006). Dominance and the evolution of sexual  
16 dimorphism in human voice pitch. *Evolution and Human Behavior*, 27(4), 283–296.  
17 <https://doi.org/10.1016/j.evolhumbehav.2005.11.003>
- 18 Puts, D. A., Hill, A. K., Bailey, D. H., Walker, R. S., Rendall, D., Wheatley, J. R., ... Ramos-  
19 Fernandez, G. (2016). Sexual selection on male vocal fundamental frequency in  
20 humans and other anthropoids. *Proc. R. Soc. B*, 283(1829), 20152830.  
21 <https://doi.org/10.1098/rspb.2015.2830>
- 22 Puts, D. A., Jones, B. C., & DeBruine, L. M. (2012). Sexual Selection on Human Faces and  
23 Voices. *The Journal of Sex Research*, 49(2–3), 227–243.  
24 <https://doi.org/10.1080/00224499.2012.658924>



Masculinity and the mechanisms of human self-domestication—Ben Gleeson

- 1 Quist, M. C., Watkins, C. D., Smith, F. G., Little, A. C., Debruine, L. M., & Jones, B. C.  
2 (2012). Sociosexuality Predicts Women's Preferences for Symmetry in Men's Faces.  
3 *Archives of Sexual Behavior; New York*, 41(6), 1415–1421.  
4 <https://doi.org/http://dx.doi.org/10.1007/s10508-011-9848-8>
- 5 Rubenstein, D. R., & Lovette, I. J. (2009). Reproductive skew and selection on female  
6 ornamentation in social species. *Nature; London*, 462(7274), 786–789.
- 7 Ruff, C. (2002). Variation in human body size and shape. *Annual Review of Anthropology*,  
8 31, 211–232.
- 9 Ruff, C., Trinkaus, E., & Holliday, T. W. (1997). Body mass and encephalization in  
10 Pleistocene Homo. *Nature*, 387(6629), 173–176. <https://doi.org/10.1038/387173a0>
- 11 Ryan, T. M., & Shaw, C. N. (2015). Gracility of the modern Homo sapiens skeleton is the  
12 result of decreased biomechanical loading. *Proceedings of the National Academy of*  
13 *Sciences*, 112(2), 372–377. <https://doi.org/10.1073/pnas.1418646112>
- 14 Sánchez-Villagra, M. R., Geiger, M., & Schneider, R. A. (2016). The taming of the neural  
15 crest: a developmental perspective on the origins of morphological covariation in  
16 domesticated mammals. *Open Science*, 3(6), 160107.  
17 <https://doi.org/10.1098/rsos.160107>
- 18 Santagati, F., & Rijli, F. M. (2003). Cranial neural crest and the building of the vertebrate  
19 head. *Nature Reviews. Neuroscience; London*, 4(10), 806–818.  
20 <https://doi.org/http://dx.doi.org.virtual.anu.edu.au/10.1038/nrn1221>
- 21 Schoenwolf, G. C., Bleyl, S. B., Brauer, P. R., & Francis-West, P. H. (2008). *Larsen's*  
22 *Human Embryology* (4 edition). Philadelphia: Churchill Livingstone.
- 23 Scott, I. M. L., Clark, A. P., Boothroyd, L. G., & Penton-Voak, I. S. (2013). Do men's faces  
24 really signal heritable immunocompetence? *Behavioral Ecology*, 24(3), 579–589.  
25 <https://doi.org/10.1093/beheco/ars092>

Masculinity and the mechanisms of human self-domestication—Ben Gleeson

- 1 Sell, A., Hone, L. S., E., & Pound, N. (2012). The Importance of Physical Strength to Human  
2 Males. *Human Nature : An Interdisciplinary Biosocial Perspective; New York*, 23(1),  
3 30–44. <https://doi.org/http://dx.doi.org.virtual.anu.edu.au/10.1007/s12110-012-9131-2>
- 4 Setchell, J. M., & Dixson, A. F. (2001). Changes in the Secondary Sexual Adornments of  
5 Male Mandrills (*Mandrillus sphinx*) Are Associated with Gain and Loss of Alpha  
6 Status. *Hormones and Behavior*, 39(3), 177–184.  
7 <https://doi.org/10.1006/hbeh.2000.1628>
- 8 Shea, B. T. (1989). Heterochrony in human evolution: The case for neoteny reconsidered.  
9 *American Journal of Physical Anthropology*, 32(S10), 69–101.  
10 <https://doi.org/10.1002/ajpa.1330320505>
- 11 Stamps, J. A., & Buechner, M. (1985). The Territorial Defense Hypothesis and the Ecology  
12 of Insular Vertebrates. *The Quarterly Review of Biology*, 60(2), 155–181.
- 13 Sterelny, K. (2011). From hominins to humans: how sapiens became behaviourally modern.  
14 *Philosophical Transactions of the Royal Society B: Biological Sciences*, 366(1566),  
15 809–822. <https://doi.org/10.1098/rstb.2010.0301>
- 16 Sterelny, K. (2012). *The Evolved Apprentice*. Caimbridge, MA: MIT Press.
- 17 Surbeck, M., Deschner, T., Schubert, G., Weltring, A., & Hohmann, G. (2012). Mate  
18 competition, testosterone and intersexual relationships in bonobos, *Pan paniscus*.  
19 *Animal Behaviour*, 83(3), 659–669. <https://doi.org/10.1016/j.anbehav.2011.12.010>
- 20 Tan, D. W., Gilani, S. Z., Maybery, M. T., Mian, A., Hunt, A., Walters, M., & Whitehouse,  
21 A. J. O. (2017). Hyperm masculinised facial morphology in boys and girls with Autism  
22 Spectrum Disorder and its association with symptomatology. *Scientific Reports*, 7(1),  
23 9348. <https://doi.org/10.1038/s41598-017-09939-y>
- 24 Theofanopoulou, C., Gastaldon, S., O'Rourke, T., Samuels, B. D., Messner, A., Martins, P.  
25 T., ... Boeckx, C. (2017). Self-domestication in *Homo sapiens*: Insights from

Masculinity and the mechanisms of human self-domestication—Ben Gleeson

- 1 comparative genomics. *PLoS One*; San Francisco, 12(10), e0185306.
- 2 <https://doi.org/http://dx.doi.org.virtual.anu.edu.au/10.1371/journal.pone.0185306>
- 3 Thompson, M. E., Zhou, A., & Knott, C. D. (2012). Low Testosterone Correlates with
- 4 Delayed Development in Male Orangutans. *PLOS ONE*, 7(10), e47282.
- 5 <https://doi.org/10.1371/journal.pone.0047282>
- 6 Thornhill, R., Chapman, J. F., & Gangestad, S. W. (2013). Women's preferences for men's
- 7 scents associated with testosterone and cortisol levels: Patterns across the ovulatory
- 8 cycle. *Evolution and Human Behavior*, 34(3), 216–221.
- 9 <https://doi.org/10.1016/j.evolhumbehav.2013.01.003>
- 10 Thornhill, R., & Fincher, C. L. (2013). The Comparative Method in Cross-Cultural and
- 11 Cross-Species Research. *Evolutionary Biology*, 40(4), 480–493.
- 12 <https://doi.org/10.1007/s11692-013-9239-2>
- 13 Tokuyama, N., & Furuichi, T. (2016). Do friends help each other? Patterns of female
- 14 coalition formation in wild bonobos at Wamba. *Animal Behaviour*, 119, 27–35.
- 15 <https://doi.org/10.1016/j.anbehav.2016.06.021>
- 16 Torimitsu, S., Makino, Y., Saitoh, H., Ishii, N., Yajima, D., Inokuchi, G., ... Iwase, H.
- 17 (2017). Determination of sex on the basis of hyoid bone measurements in a Japanese
- 18 population using multidetector computed tomography. *International Journal of Legal*
- 19 *Medicine*, 1–8. <https://doi.org/10.1007/s00414-017-1728-x>
- 20 Trivers, R. L. (1972). Parental investment and sexual selection. In B. M. Campbell (Ed.),
- 21 *Sexual Selection and the Descent of Man, 1871-1971* (pp. 136–179). Chicago: Aldine.
- 22 Trut, L., Kharlamova, A. V., Kukekova, A. V., Acland, G. M., Carrier, D. R., Chase, K., &
- 23 Lark, K. G. (2006). Morphology and Behavior: Are They Coupled at the Genome
- 24 Level? In E. A. Ostrander, K. Lindblad-Toh, & U. Giger (Eds.), *The Dog and its*
- 25 *Genome* (Vol. 44, pp. 81–93). Cold Spring Harbor Laboratory Press.

Masculinity and the mechanisms of human self-domestication—Ben Gleeson

- 1 Trut, L. N. (1999). Early Canid Domestication: The Farm-Fox Experiment. *American*  
2 *Scientist*, 87(2), 160. <https://doi.org/10.1511/1999.2.160>
- 3 Trut, L. N., Herbek, Y. E., Trapezov, O. V., Lashin, S. A., Matushkin, Y. G., Markel, A. L.,  
4 & Kolchanov, N. A. (2016). The Animal Domestication Experiment as a Model of the  
5 Evolutionary Process: A New Insight into Evolution Under Selection Targeting  
6 Regulatory Systems. In *Genetics, Evolution and Radiation* (pp. 455–477). Springer,  
7 Cham. [https://doi.org/10.1007/978-3-319-48838-7\\_37](https://doi.org/10.1007/978-3-319-48838-7_37)
- 8 Trut, L. N., Kharlamova, A. V., Kukekova, A. V., Acland, G. M., Carrier, D. R., Chase, K.,  
9 & Lark, K. G. (2006). Morphology and Behavior: Are They Coupled at the Genome  
10 Level? In E. A. Ostrander, K. Lindblad-Toh, & U. Giger (Eds.), *The Dog and its*  
11 *Genome* (Vol. 44, pp. 81–93). Cold Spring Harbor Laboratory Press.
- 12 Trut, L. N., Oskina, I., & Kharlamova, A. (2009). Animal evolution during domestication: the  
13 domesticated fox as a model. *BioEssays*, 31(3), 349–360.  
14 <https://doi.org/10.1002/bies.200800070>
- 15 Trut, L., Oskina, I. N., & Kharlamova, A. V. (2001). Experimental Studies of Early Canid  
16 Domestication. In E. A. Ostrander & A. Ruvinsky (Eds.), *Genetics of the Dog* (2nd  
17 ed.). Oxfordshire, UK and Cambridge, MA, USA: CAB International.
- 18 Ueharu, H., Yoshida, S., Kikkawa, T., Kanno, N., Higuchi, M., Kato, T., ... Kato, Y. (2017).  
19 Gene tracing analysis reveals the contribution of neural crest-derived cells in pituitary  
20 development. *Journal of Anatomy*, 230(3), 373–380.  
21 <https://doi.org/10.1111/joa.12572>
- 22 Valasek, P., Theis, S., Krejci, E., Grim, M., Maina, F., Shwartz, Y., ... Patel, K. (2010).  
23 Somitic origin of the medial border of the mammalian scapula and its homology to the  
24 avian scapula blade. *Journal of Anatomy*, 216(4), 482–488.  
25 <https://doi.org/10.1111/j.1469-7580.2009.01200.x>

Masculinity and the mechanisms of human self-domestication—Ben Gleeson

- 1 van Schaik, C. P. (2016). *The Primate Origins of Human Nature* (1 edition). Hoboken, New  
2 Jersey: Wiley-Blackwell.
- 3 Vandenberg, J. G. (1965). Hormonal basis of sex skin in male rhesus monkeys. *General and*  
4 *Comparative Endocrinology*, 5(1), 31–34. [https://doi.org/10.1016/0016-](https://doi.org/10.1016/0016-6480(65)90065-1)  
5 [6480\(65\)90065-1](https://doi.org/10.1016/0016-6480(65)90065-1)
- 6 Verdonck, A., De Ridder, L., Verbeke, G., Bourguignon, J. P., Carels, C., Kühn, E. R., ... de  
7 Zegher, F. (1998). Comparative effects of neonatal and prepubertal castration on  
8 craniofacial growth in rats. *Archives of Oral Biology*, 43(11), 861–871.  
9 [https://doi.org/10.1016/S0003-9969\(98\)00071-5](https://doi.org/10.1016/S0003-9969(98)00071-5)
- 10 Verdonck, A., Gaethofs, M., Carels, C., & de Zegher, F. (1999). Effect of low-dose  
11 testosterone treatment on craniofacial growth in boys with delayed puberty. *European*  
12 *Journal of Orthodontics*, 21(2), 137–143. <https://doi.org/10.1093/ejo/21.2.137>
- 13 White, F. J. (1996). Comparative socioecology of *Pan paniscus*. In W. C. McGrew, T.  
14 Nishida, & L. Marchant (Eds.), *Great Ape Societies* (pp. 29–41). Cambridge:  
15 Cambridge University Press.
- 16 White, F. J., Waller, M. T., & Boose, K. J. (2013). Evolution of primate peace. In D. Fry  
17 (Ed.), *War, Peace and Human Nature: The Convergence of Evolutionary and*  
18 *Cultural Views* (pp. 389–406). Oxford University Press.
- 19 White, F. J., & Wood, K. D. (2007). Female feeding priority in bonobos, *Pan paniscus*, and  
20 the question of female dominance. *American Journal of Primatology*, 69(8), 837–850.  
21 <https://doi.org/10.1002/ajp.20387>
- 22 Whitehouse, A. J. O., Gilani, S. Z., Shafait, F., Mian, A., Tan, D. W., Maybery, M. T., ...  
23 Eastwood, P. (2015). Prenatal testosterone exposure is related to sexually dimorphic  
24 facial morphology in adulthood. *Proceedings of the Royal Society B: Biological*  
25 *Sciences*, 282(1816). <https://doi.org/10.1098/rspb.2015.1351>

Masculinity and the mechanisms of human self-domestication—Ben Gleeson

- 1 Widmaier, E. P., Raff, H., Strang, K. T., & Vander, A. J. (2010). *Vander's Human*  
2 *Physiology: The Mechanisms of Body Function, 12th Edition* (12th edition). New  
3 York: McGraw Hill.
- 4 Wilkins, A. S., Wrangham, R. W., & Tecumseh Fitch, W. (2014). The “domestication  
5 syndrome” in mammals: A unified explanation based on neural crest cell behavior and  
6 genetics. *Genetics*, 197(3), 795–808. <https://doi.org/10.1534/genetics.114.165423>
- 7 Windhager, S., Schaefer, K., & Fink, B. (2011). Geometric morphometrics of male facial  
8 shape in relation to physical strength and perceived attractiveness, dominance, and  
9 masculinity. *American Journal of Human Biology: The Official Journal of the Human*  
10 *Biology Council*, 23(6), 805–814. <https://doi.org/10.1002/ajhb.21219>
- 11 Wobber, V., Hare, B., Lipson, S., Wrangham, R. W., & Ellison, P. (2013). Different  
12 ontogenetic patterns of testosterone production reflect divergent male reproductive  
13 strategies in chimpanzees and bonobos. *Physiology and Behavior*, 116–117, 44–53.  
14 <https://doi.org/10.1016/j.physbeh.2013.03.003>
- 15 Wood, W., Kressel, L., Joshi, P. D., & Louie, B. (2014). Meta-Analysis of Menstrual Cycle  
16 Effects on Women's Mate Preferences. *Emotion Review*, 6(3), 229–249.  
17 <https://doi.org/10.1177/1754073914523073>
- 18 Wrangham, R. W. (2014). *Did Homo sapiens Self-Domesticate?* Presented at the Center for  
19 Academic Research and Training in Anthropogeny: Domestication and Human  
20 Evolution. Retrieved from <https://www.youtube.com/watch?v=acOZT240bTA>
- 21 Wrangham, R. W. (2018). Two types of aggression in human evolution. *Proceedings of the*  
22 *National Academy of Sciences*, 115(2), 245–253.  
23 <https://doi.org/10.1073/pnas.1713611115>



Masculinity and the mechanisms of human self-domestication—Ben Gleeson

- 1 Wrangham, R. W., & Glowacki, L. (2012). Intergroup Aggression in Chimpanzees and War  
2 in Nomadic Hunter-Gatherers. *Human Nature*, 23(1), 5–29.  
3 <https://doi.org/10.1007/s12110-012-9132-1>
- 4 Wright, D. (2015). The Genetic Architecture of Domestication in Animals. *Bioinformatics  
5 and Biology Insights*, 9(Suppl 4), 11–20. <https://doi.org/10.4137/BBI.S28902>
- 6 Zeder, M. A. (2008). Animal Domestication in the Zagros: an Update and Directions for  
7 Future Research. In E. Vila, L. Goucherin, A. Choyke, & H. Buitenhuis (Eds.),  
8 *Archaeozoology of the Near East VIII* (Vol. 49, pp. 243–277). Lyon. Retrieved from  
9 [http://www.persee.fr/doc/mom\\_1955-4982\\_2008\\_act\\_49\\_1\\_2709](http://www.persee.fr/doc/mom_1955-4982_2008_act_49_1_2709)
- 10 Zeder, M. A. (2012). The Domestication of Animals. *Journal of Anthropological Research*,  
11 68(2), 161–190.
- 12 Zeder, M. A. (2015). Core questions in domestication research. *Proceedings of the National  
13 Academy of Sciences*, 112(11), 3191–3198. <https://doi.org/10.1073/pnas.1501711112>
- 14 Zipser, B., Schlekking, A., Kaiser, S., & Sachser, N. (2014). Effects of domestication on  
15 biobehavioural profiles: a comparison of domestic guinea pigs and wild cavies from  
16 early to late adolescence. *Frontiers in Zoology*, 11, 30. [https://doi.org/10.1186/1742-  
17 9994-11-30](https://doi.org/10.1186/1742-9994-11-30)
- 18 Zollikofer, C. P. E., & Ponce de León, M. S. (2010). The evolution of hominin ontogenies.  
19 *Seminars in Cell & Developmental Biology*, 21(4), 441–452.  
20 <https://doi.org/10.1016/j.semcdb.2009.10.012>
- 21
